# Supplementary material
Source: PubMed Central journal article supplement (PMC5467443)
Supplement: NIHMS867290-supplement-supplemental_figures.pdf [file NIHMS867290-supplement-supplemental_figures.pdf]

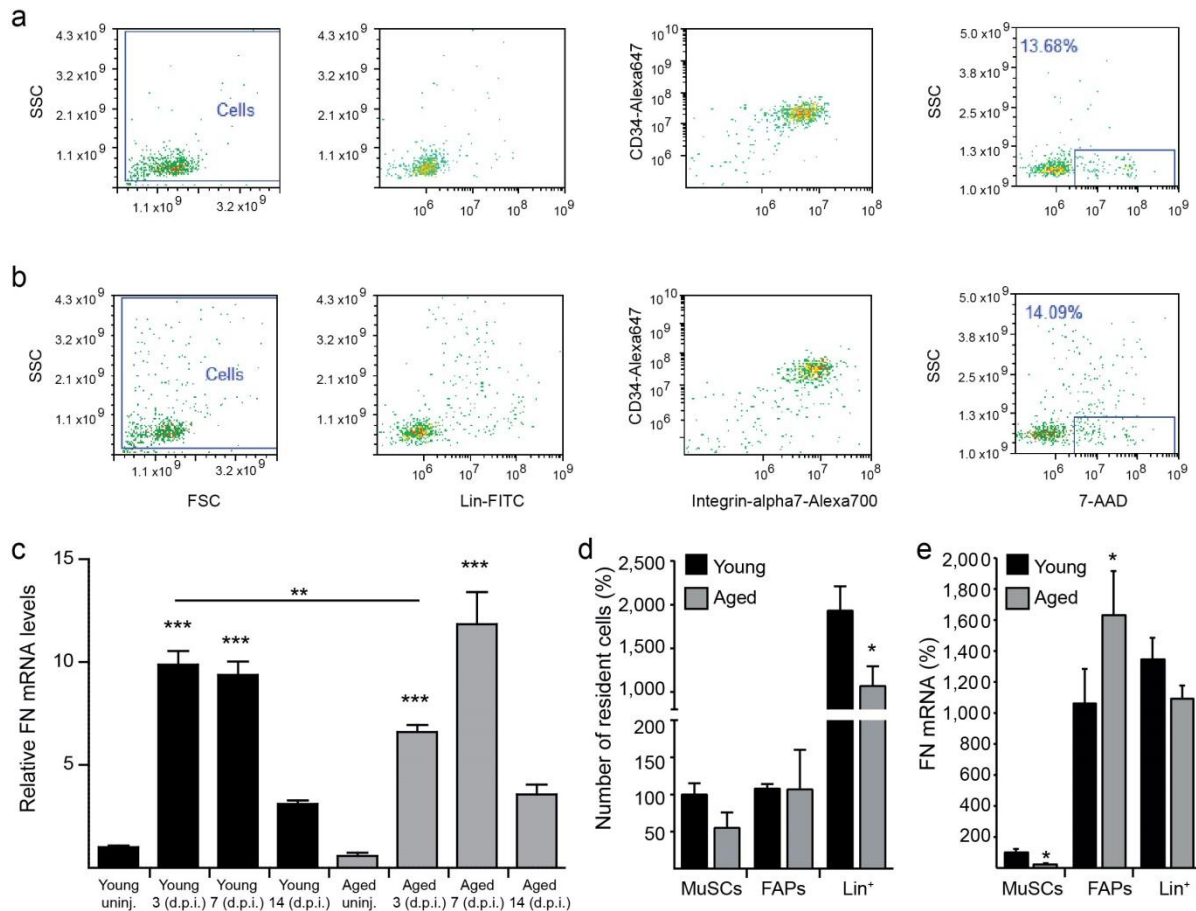

**Supplementary figure 1** MuSC viability following FACS and FN levels in young and aged tissue. **(a, b)** MuSCs were gated for lineage negativity (Lin–FITC), and positively for CD34 (CD34–Alexa647), Integrin–alpha7 (Integrin–alpha7–Alexa700) and for the viability dye 7–AAD (7–aminoactinomycin D). Based on 7–AAD staining, 13,68 % of aged **(a)** and 14.09 % of young **(b)** cells that were identified as not viable. No major differences in viability were observed between the conditions. **(c)** qPCR for FN expression from RNA isolated from uninjured muscles or 3, 7 and 14 days post injury. Bars are normalized to Young uninj. **(d)** Number of isolated cells from young and aged muscles at 3 d.p.i. quantified by flow cytometry. **(e)** qPCR for FN expression from RNA isolated from different cell types isolated from muscles 3 d.p.i. Expression values were quantified on equal amounts of total RNA. Throughout, bars represent means + s.e.m.. All replicates are biological.  $n = 8$  **(c)**,  $n = 4$  **(d)**;  $n = 5$  for young and  $n = 6$  for aged **(e)**. \*\*\*  $P < 0.001$ , \*\*  $P < 0.01$ , \*  $P \leq 0.05$  versus uninj. or comparison indicated; one–way ANOVA followed by Bonferroni post–test **(c)** or Student’s  $t$ –test **(d, e)**.

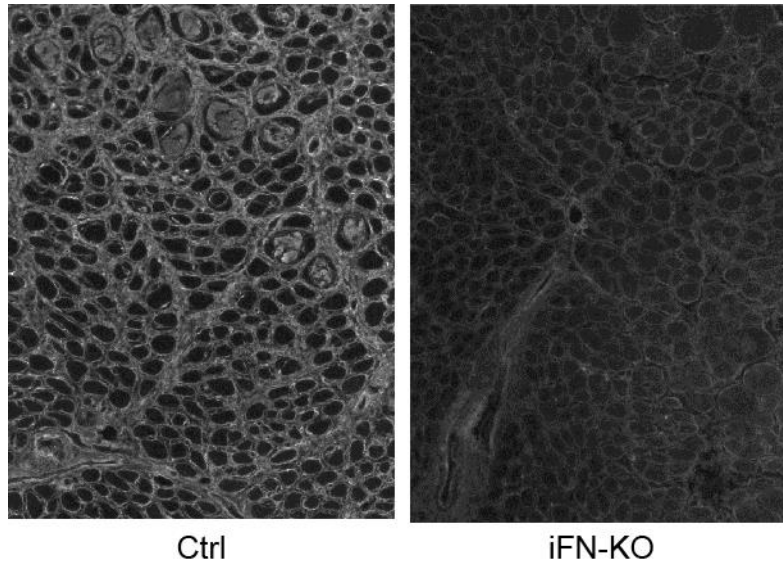

**Supplementary figure 2** FN tissue levels in iFN-KO mice. Immunostaining for Fibronectin (FN) from muscles of control (Ctrl) or FN knockout mice (iFN-KO) five days following injury. Images were acquired with the same exposure time.

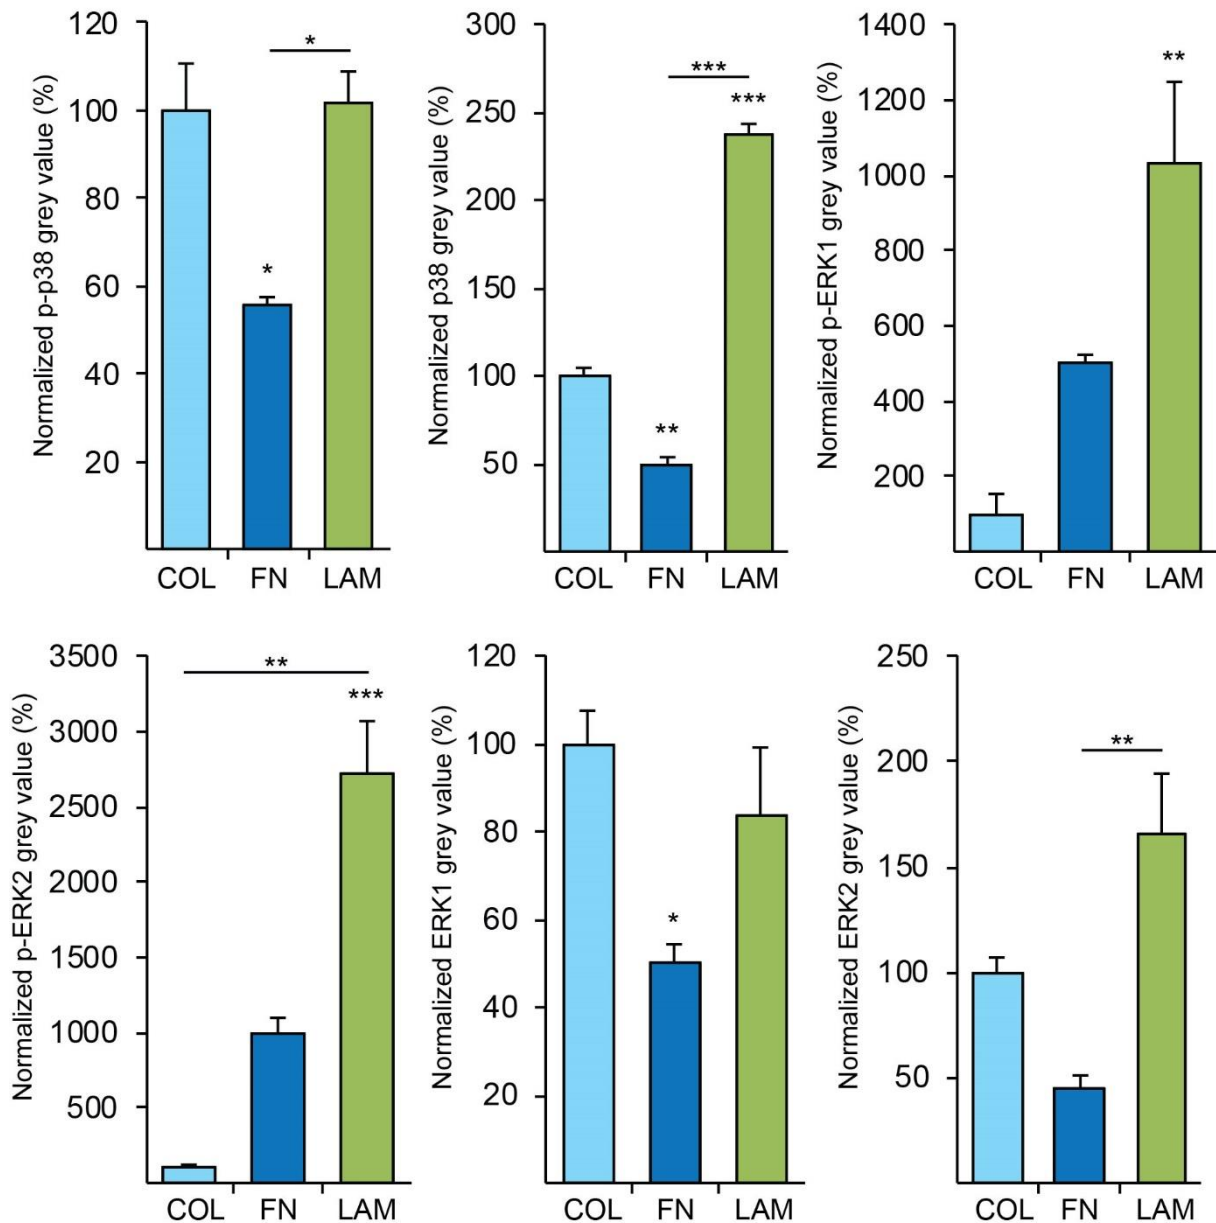

**Supplementary figure 3** Quantification of western blot grey values for figure 3a. Grey values were background corrected and normalized to actin. Bars represent means + s.e.m..  $n = 3$  cell lysates from independent experiments per condition. One-way ANOVA followed by Bonferroni post-test. \*\*\*  $P < 0.001$ , \*\*  $P < 0.01$ , \*  $P < 0.05$ .

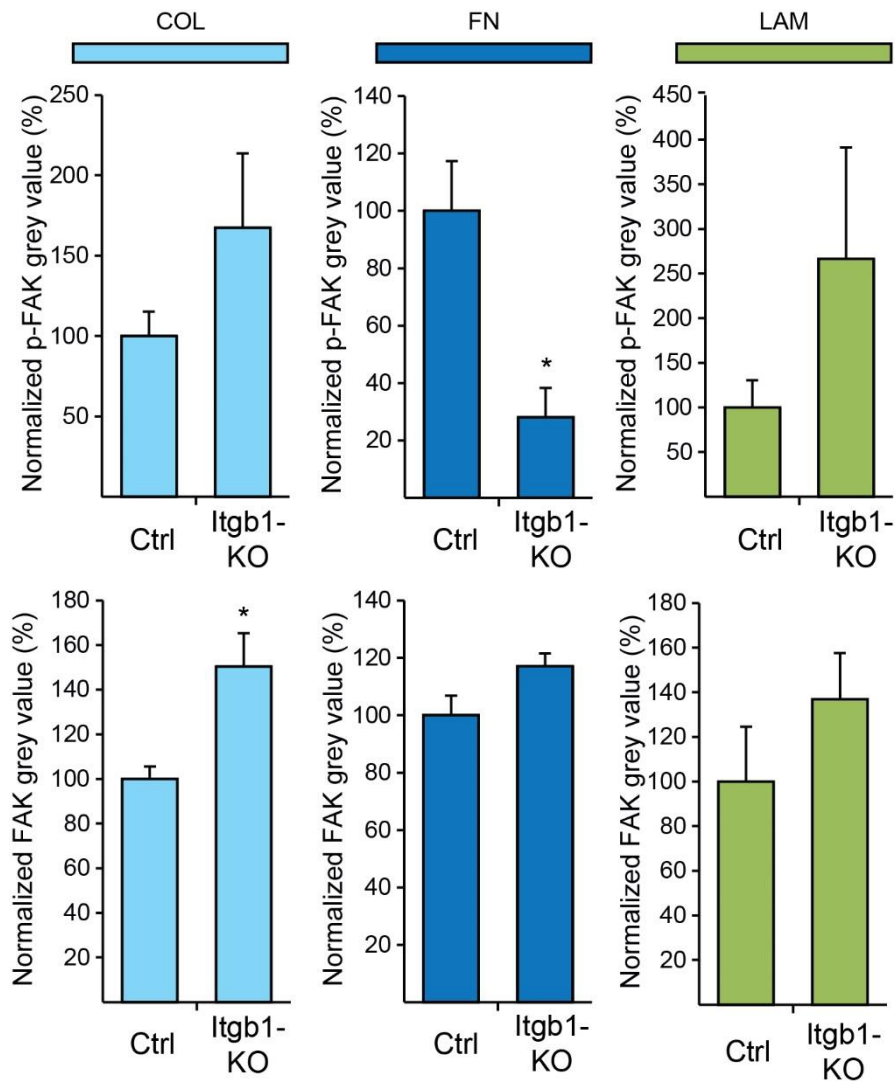

**Supplementary figure 4** Quantification of western blot grey values for figure 4g. Grey values were background corrected and normalized to GAPDH. Bars represent means + s.e.m..  $n = 3$  cell lysates from independent experiments per condition. Student's  $t$ -test  $P$  value is \*  $P < 0.05$ .

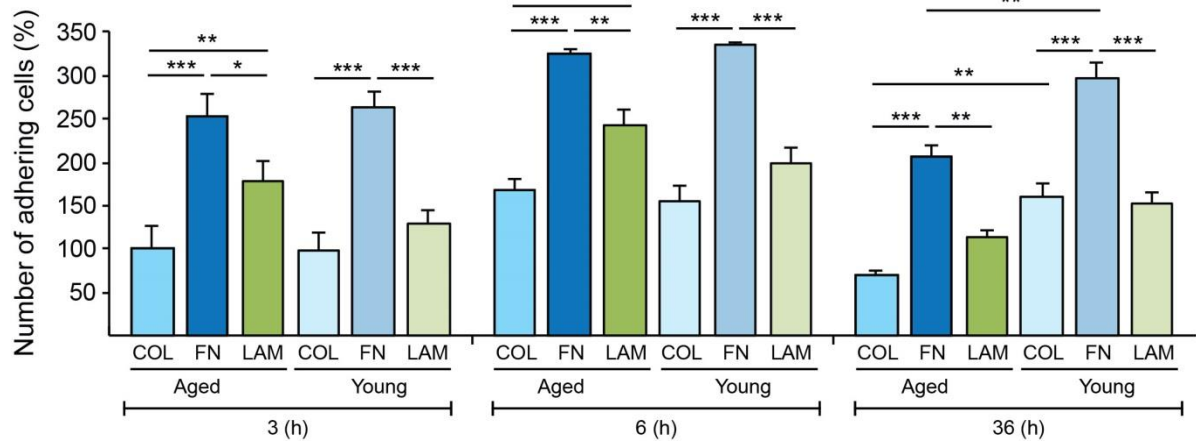

**Supplementary figure 5** Adhesion capacity of freshly isolated aged and young MuSCs. Cells were analyzed 3 h, 6 h and 36 h after seeding on COL, FN or LAM. Bars represent means + s.e.m..  $n = 3$  mice. two-way ANOVA followed by Bonferroni post-test. \*\*\*  $P < 0.001$ , \*\*  $P < 0.01$ , \*  $P < 0.05$ .

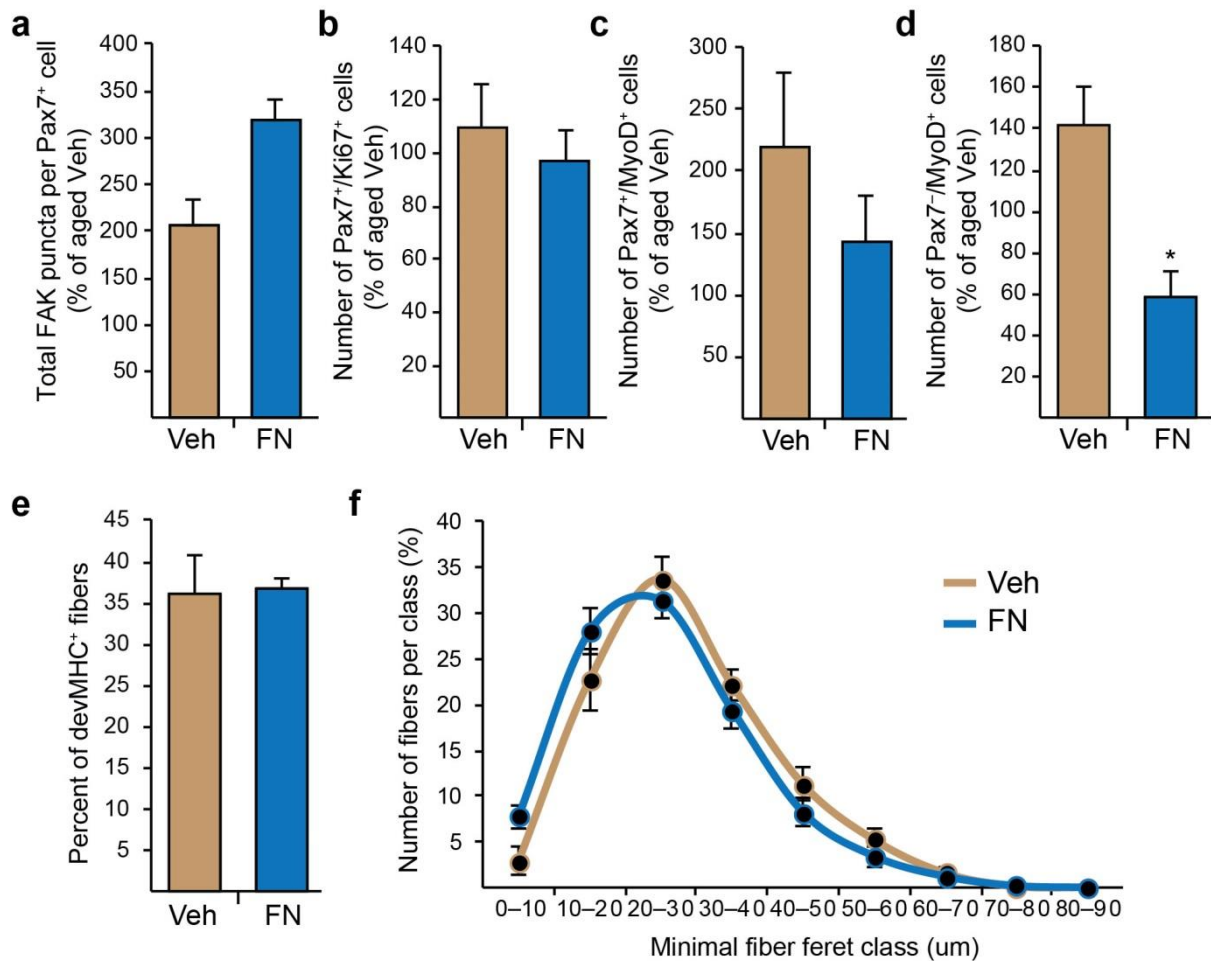

**Supplementary figure 6** FN treatment has limited effects on muscle regeneration in young mice. **(a)** Quantification of FAK levels in Pax7<sup>+</sup> MuSCs in tissue sections of vehicle (Veh) or FN treated young mice at 5 d.p.i. **(b–d)** Numbers of Pax7 and Ki67 positive (Pax7<sup>+</sup>Ki67<sup>+</sup>) cells, Pax7 and MyoD (Pax7<sup>+</sup>MyoD<sup>+</sup>) positive cells, and Pax7 negative MyoD positive (Pax7<sup>-</sup>MyoD<sup>+</sup>) cells per area in muscle cross sections of Veh or FN treated young mice at 5 d.p.i. **(e)** Quantification of the percentage of devMHC<sup>+</sup> fibers in muscles of young Veh or Col treated mice at 7 d.p.i. **(f)** Fiber size quantification from young Veh or FN treated mice at 7 d.p.i. Throughout, bars and data points represent means + s.e.m. and  $\pm$  s.e.m., respectively.  $n = 3$  (**c** FN),  $n = 4$  (**a**, **b**, **c** Veh, **d**) or  $n = 5$  (**e**, **f**) mice per condition. \*  $P < 0.05$ . Student's  $t$ -test.

**Supplementary table 1** Pathway analysis in young versus aged MuSCs. The table is based on microarray data from freshly isolated young and old MuSCs at 3 d.p.i. Core enrichment genes in the KEGG pathways ECM-receptor interaction, JAK-STAT signaling pathway, MAPK signaling pathway and cell cycle. Microarrays were performed on MuSCs from n = 6 aged mice and n = 5 young mice.

| <b>JAK_STAT_SIGNALING_PATHWAY</b>  |                          |                          |                   |                  |                    |
|------------------------------------|--------------------------|--------------------------|-------------------|------------------|--------------------|
| <b>SIZE</b>                        | <b>ES</b>                | <b>NES</b>               | <b>NOM p-val</b>  | <b>FDR q-val</b> | <b>RANK AT MAX</b> |
| 79                                 | -0.379                   | -1.706                   | 1.01E-03          | 5.45E-02         | 1393               |
| <b>GENE SYMBOL</b>                 | <b>RANK IN GENE LIST</b> | <b>RANK METRIC SCORE</b> | <b>RUNNING ES</b> |                  |                    |
| IFNGR2                             | 8661                     | -1.121                   | -0.365            |                  |                    |
| CSF2RA                             | 8768                     | -1.167                   | -0.361            |                  |                    |
| CISH                               | 8779                     | -1.172                   | -0.347            |                  |                    |
| CBLC                               | 8801                     | -1.19                    | -0.335            |                  |                    |
| IFNGR1                             | 9064                     | -1.361                   | -0.344            |                  |                    |
| PIK3R3                             | 9083                     | -1.373                   | -0.328            |                  |                    |
| IL28RA                             | 9102                     | -1.383                   | -0.313            |                  |                    |
| OSMR                               | 9180                     | -1.44                    | -0.302            |                  |                    |
| STAT6                              | 9236                     | -1.497                   | -0.289            |                  |                    |
| TSLP                               | 9411                     | -1.67                    | -0.286            |                  |                    |
| CSF2                               | 9587                     | -1.883                   | -0.280            |                  |                    |
| PIK3R1                             | 9593                     | -1.894                   | -0.256            |                  |                    |
| PIK3CG                             | 9649                     | -1.995                   | -0.237            |                  |                    |
| OSM                                | 9809                     | -2.32                    | -0.224            |                  |                    |
| STAT3                              | 9827                     | -2.376                   | -0.196            |                  |                    |
| SOCS2                              | 9851                     | -2.458                   | -0.167            |                  |                    |
| IL6                                | 9884                     | -2.56                    | -0.138            |                  |                    |
| SOCS3                              | 10026                    | -3.885                   | -0.104            |                  |                    |
| IL10                               | 10052                    | -8.457                   | 0.000             |                  |                    |
| <b>KEGG_MAPK_SIGNALING_PATHWAY</b> |                          |                          |                   |                  |                    |
| <b>SIZE</b>                        | <b>ES</b>                | <b>NES</b>               | <b>NOM p-val</b>  | <b>FDR q-val</b> | <b>RANK AT MAX</b> |
| 147                                | -0.272                   | -1.359                   | 3.13E-02          | 2.46E-01         | 2094               |
| <b>GENE SYMBOL</b>                 | <b>RANK IN GENE LIST</b> | <b>RANK METRIC SCORE</b> | <b>RUNNING ES</b> |                  |                    |
| RELA                               | 7960                     | -0.808                   | -0.266            |                  |                    |
| FAS                                | 7981                     | -0.816                   | -0.263            |                  |                    |
| MAPK11                             | 8023                     | -0.834                   | -0.261            |                  |                    |
| RPS6KA3                            | 8026                     | -0.835                   | -0.256            |                  |                    |
| TGFB3                              | 8167                     | -0.891                   | -0.264            |                  |                    |
| CACNB4                             | 8192                     | -0.900                   | -0.260            |                  |                    |
| PPP3CA                             | 8253                     | -0.919                   | -0.260            |                  |                    |
| TGFBR2                             | 8338                     | -0.964                   | -0.262            |                  |                    |
| PRKCA                              | 8440                     | -1.005                   | -0.265            |                  |                    |
| HSPB1                              | 8451                     | -1.011                   | -0.259            |                  |                    |

|                        |                          |                          |                   |                  |                    |
|------------------------|--------------------------|--------------------------|-------------------|------------------|--------------------|
| FGF1                   | 8492                     | -1.034                   | -0.256            |                  |                    |
| MAP3K1                 | 8526                     | -1.050                   | -0.252            |                  |                    |
| DUSP7                  | 8551                     | -1.063                   | -0.247            |                  |                    |
| DAXX                   | 8600                     | -1.087                   | -0.245            |                  |                    |
| CACNB1                 | 8706                     | -1.143                   | -0.247            |                  |                    |
| STK4                   | 8723                     | -1.149                   | -0.241            |                  |                    |
| CDC42                  | 8872                     | -1.240                   | -0.247            |                  |                    |
| BDNF                   | 9028                     | -1.336                   | -0.254            |                  |                    |
| PPP3CC                 | 9055                     | -1.355                   | -0.247            |                  |                    |
| MAP3K8                 | 9093                     | -1.378                   | -0.242            |                  |                    |
| DUSP8                  | 9115                     | -1.391                   | -0.234            |                  |                    |
| PRKACB                 | 9129                     | -1.405                   | -0.226            |                  |                    |
| TGFB2                  | 9259                     | -1.519                   | -0.228            |                  |                    |
| TNF                    | 9295                     | -1.561                   | -0.221            |                  |                    |
| NTRK2                  | 9307                     | -1.567                   | -0.212            |                  |                    |
| JUN                    | 9375                     | -1.630                   | -0.207            |                  |                    |
| RASGRP1                | 9390                     | -1.654                   | -0.197            |                  |                    |
| PDGFRA                 | 9529                     | -1.799                   | -0.199            |                  |                    |
| HSPA1A                 | 9581                     | -1.873                   | -0.191            |                  |                    |
| CACNA1H                | 9661                     | -2.008                   | -0.185            |                  |                    |
| PRKX                   | 9671                     | -2.028                   | -0.172            |                  |                    |
| CD14                   | 9726                     | -2.112                   | -0.163            |                  |                    |
| MAPK8                  | 9770                     | -2.202                   | -0.152            |                  |                    |
| RAP1B                  | 9779                     | -2.229                   | -0.138            |                  |                    |
| GADD45B                | 9844                     | -2.416                   | -0.128            |                  |                    |
| IL1B                   | 9875                     | -2.537                   | -0.113            |                  |                    |
| IL1R2                  | 9889                     | -2.593                   | -0.097            |                  |                    |
| FOS                    | 9891                     | -2.611                   | -0.079            |                  |                    |
| MAP3K6                 | 9893                     | -2.622                   | -0.061            |                  |                    |
| DUSP1                  | 9894                     | -2.622                   | -0.043            |                  |                    |
| NFATC4                 | 9921                     | -2.706                   | -0.027            |                  |                    |
| FGF7                   | 9956                     | -2.917                   | -0.011            |                  |                    |
| MAP2K5                 | 9960                     | -2.937                   | 0.009             |                  |                    |
| <b>KEGG_CELL_CYCLE</b> |                          |                          |                   |                  |                    |
| <b>SIZE</b>            | <b>ES</b>                | <b>NES</b>               | <b>NOM p-val</b>  | <b>FDR q-val</b> | <b>RANK AT MAX</b> |
| 87                     | 0.362                    | 1.466                    | 1.58E-02          | 1.92E-01         | 3241               |
| <b>GENE SYMBOL</b>     | <b>RANK IN GENE LIST</b> | <b>RANK METRIC SCORE</b> | <b>RUNNING ES</b> |                  |                    |
| CDKN2D                 | 18                       | 4.314                    | 0.050             |                  |                    |
| BUB1B                  | 148                      | 2.966                    | 0.072             |                  |                    |
| CCND1                  | 177                      | 2.843                    | 0.103             |                  |                    |
| CDKN2B                 | 206                      | 2.739                    | 0.133             |                  |                    |
| CDKN1A                 | 266                      | 2.566                    | 0.158             |                  |                    |
| CDC25C                 | 369                      | 2.374                    | 0.176             |                  |                    |
| E2F3                   | 423                      | 2.275                    | 0.198             |                  |                    |
| CDKN2A                 | 476                      | 2.208                    | 0.219             |                  |                    |
| CCNB1                  | 653                      | 1.994                    | 0.225             |                  |                    |
| RBL1                   | 806                      | 1.848                    | 0.232             |                  |                    |
| E2F4                   | 883                      | 1.785                    | 0.246             |                  |                    |
| ZBTB17                 | 886                      | 1.783                    | 0.267             |                  |                    |
| CDC6                   | 898                      | 1.775                    | 0.287             |                  |                    |
| SKP2                   | 971                      | 1.717                    | 0.300             |                  |                    |



|                                      |                          |                          |                   |                  |                    |
|--------------------------------------|--------------------------|--------------------------|-------------------|------------------|--------------------|
| TFDP2                                | 1163                     | 1.594                    | 0.300             |                  |                    |
| ESPL1                                | 1172                     | 1.583                    | 0.318             |                  |                    |
| ATM                                  | 1284                     | 1.519                    | 0.325             |                  |                    |
| CHEK2                                | 1407                     | 1.451                    | 0.330             |                  |                    |
| YWHAZ                                | 1418                     | 1.445                    | 0.346             |                  |                    |
| ANAPC7                               | 1570                     | 1.367                    | 0.348             |                  |                    |
| CCNE1                                | 1897                     | 1.208                    | 0.329             |                  |                    |
| STAG1                                | 1918                     | 1.199                    | 0.342             |                  |                    |
| E2F2                                 | 2053                     | 1.143                    | 0.342             |                  |                    |
| CDC7                                 | 2105                     | 1.124                    | 0.350             |                  |                    |
| ANAPC4                               | 2299                     | 1.058                    | 0.343             |                  |                    |
| FZR1                                 | 2445                     | 1.005                    | 0.341             |                  |                    |
| YWHAE                                | 2550                     | 0.969                    | 0.342             |                  |                    |
| SMAD2                                | 2566                     | 0.962                    | 0.352             |                  |                    |
| CDC20                                | 2595                     | 0.953                    | 0.361             |                  |                    |
| CUL1                                 | 2937                     | 0.833                    | 0.336             |                  |                    |
| RBX1                                 | 2985                     | 0.815                    | 0.341             |                  |                    |
| MCM2                                 | 2986                     | 0.815                    | 0.351             |                  |                    |
| ANAPC5                               | 3069                     | 0.786                    | 0.352             |                  |                    |
| CDC25A                               | 3188                     | 0.743                    | 0.349             |                  |                    |
| MAD2L2                               | 3209                     | 0.734                    | 0.356             |                  |                    |
| PLK1                                 | 3241                     | 0.723                    | 0.362             |                  |                    |
| <b>KEGG_ECM_RECEPTOR_INTERACTION</b> |                          |                          |                   |                  |                    |
| <b>SIZE</b>                          | <b>ES</b>                | <b>NES</b>               | <b>NOM p-val</b>  | <b>FDR q-val</b> | <b>RANK AT MAX</b> |
| 51                                   | -0.479                   | -1.996                   | 0.00E+00          | 9.07E-03         | 2206               |
| <b>GENE SYMBOL</b>                   | <b>RANK IN GENE LIST</b> | <b>RANK METRIC SCORE</b> | <b>RUNNING ES</b> |                  |                    |
| SDC3                                 | 7848                     | -0.762                   | -0.462            |                  |                    |
| COL6A1                               | 8013                     | -0.830                   | -0.459            |                  |                    |
| SV2A                                 | 8144                     | -0.882                   | -0.452            |                  |                    |
| ITGA11                               | 8330                     | -0.958                   | -0.449            |                  |                    |
| RELN                                 | 8437                     | -1.005                   | -0.437            |                  |                    |
| CD47                                 | 8530                     | -1.052                   | -0.422            |                  |                    |
| HSPG2                                | 8592                     | -1.084                   | -0.403            |                  |                    |
| COL4A2                               | 8818                     | -1.204                   | -0.399            |                  |                    |
| TNXB                                 | 8870                     | -1.237                   | -0.376            |                  |                    |
| COL4A1                               | 9051                     | -1.351                   | -0.363            |                  |                    |
| COL2A1                               | 9070                     | -1.365                   | -0.334            |                  |                    |
| COL5A1                               | 9117                     | -1.392                   | -0.307            |                  |                    |
| TNC                                  | 9393                     | -1.655                   | -0.297            |                  |                    |
| ITGB5                                | 9423                     | -1.677                   | -0.261            |                  |                    |
| LAMC3                                | 9443                     | -1.697                   | -0.225            |                  |                    |
| SV2B                                 | 9528                     | -1.798                   | -0.192            |                  |                    |
| SDC1                                 | 9610                     | -1.930                   | -0.157            |                  |                    |
| THBS2                                | 9622                     | -1.943                   | -0.114            |                  |                    |
| VTN                                  | 9638                     | -1.974                   | -0.070            |                  |                    |
| COMP                                 | 9787                     | -2.258                   | -0.034            |                  |                    |
| LAMB2                                | 9906                     | -2.649                   | 0.015             |                  |                    |

**Supplementary table 2** Antibody arrays from myoblasts grown on FN or Col. Protein lysates from mouse MuSC derived myoblasts were grown on either Col or FN. Signals obtained for phospho-specific antibodies were normalized to the signal obtained from the respective pan antibodies. Values represent the percent change observed in cells on FN when compared to Col. Percent change was calculated from the means of  $n = 3$  replicate arrays for FN and Col. A cut off of at least 10 % change was applied.

| Phospho-specific antibody             | Pan antibody                  | % change on FN (after normalization to pan antibody) |
|---------------------------------------|-------------------------------|------------------------------------------------------|
| 14-3-3 beta/zeta (Phospho-Ser184/186) | 14-3-3 beta/zeta (Ab-184/186) | -23                                                  |
| AurA (Phospho-Ser342)                 | AurA (Ab-342)                 | -24                                                  |
| BAD (Phospho-Ser134)                  | BAD (Ab-134)                  | -15                                                  |
| CaMK2A (Phospho-Thr286)               | CaMK2A (Ab-286)               | -30                                                  |
| CDK1/CDC2 (Phospho-Thr14)             | CDK1/CDC2 (Ab-14)             | 16                                                   |
| Chk1 (Phospho-Ser301)                 | Chk1 (Ab-286)                 | -22                                                  |
| Chk2 (Phospho-Ser516)                 | Chk2 (Ab-516)                 | -33                                                  |
| Cyclin B1 (Phospho-Ser147)            | Cyclin B1 (Ab-147)            | -26                                                  |
| DYN1 (Phospho-Ser774)                 | DYN1 (Ab-774)                 | 61                                                   |
| eIF4E (Phospho-Ser209)                | eIF4E (Ab-209)                | -26                                                  |
| eNOS (Phospho-Ser1177)                | eNOS (Ab-1177)                | -22                                                  |
| EPHA2/3/4 (Phospho-Tyr588/596)        | EPHA2/3/4 (Ab-588/596)        | -21                                                  |
| Ezrin (Phospho-Thr566)                | Ezrin (Ab-566)                | 54                                                   |
| FAK (Phospho-Tyr397)                  | FAK (Ab-397)                  | -26                                                  |
| FKHR/FOXO1A (Phospho-Ser329)          | FKHR/FOXO1A (Ab-329)          | 18                                                   |
| FKHRL1/FOXO3A (Phospho-Ser253)        | FKHRL1/FOXO3A (Ab-253)        | -20                                                  |
| Gab2 (Phospho-Tyr643)                 | Gab2 (Ab-623)                 | -40                                                  |
| GSK3 beta (Phospho-Ser9)              | GSK3 beta (Ab-9)              | 43                                                   |
| HDAC3 (Phospho-Ser424)                | HDAC3 (Ab-424)                | 50                                                   |
| HDAC5 (Phospho-Ser259)                | HDAC5 (Ab-259)                | 42                                                   |
| HER2 (Phospho-Tyr1248)                | HER2 (Ab-1248)                | -24                                                  |
| HER3/ErbB3 (Phospho-Tyr1289)          | HER3/ErbB3 (Ab-1289)          | 32                                                   |
| IKK-alpha/beta (Phospho-Ser180/181)   | IKK-alpha/beta (Ab-180/181)   | 65                                                   |
| Integrin beta-1 (Phospho-Thr788)      | Integrin beta-1 (Ab-788)      | -21                                                  |
| Lamin A/C (Phospho-Ser392)            | Lamin A/C (Ab-392)            | -30                                                  |
| LKB1 (Phospho-Ser428)                 | LKB1 (Ab-428)                 | -31                                                  |
| LKB1 (Phospho-Thr189)                 | LKB1 (Ab-189)                 | -32                                                  |
| LYN (Phospho-Tyr507)                  | LYN (Ab-507)                  | -39                                                  |
| MAP3K8/COT (Phospho-Thr290)           | MAP3K8/COT (Ab-290)           | 13                                                   |
| MARCKS (Phospho-Ser163)               | MARCKS (Ab-163)               | -16                                                  |

|                                       |                               |     |
|---------------------------------------|-------------------------------|-----|
| M-CSF Receptor (Phospho-Tyr809)       | M-CSF Receptor (Ab-809)       | -17 |
| MEK2 (Phospho-Thr394)                 | MEK2 (Ab-394)                 | 58  |
| MKK7/MAP2K7 (Phospho-Ser271)          | MKK7/MAP2K7 (Ab-271)          | 17  |
| MSK1 (Phospho-Ser360)                 | MSK1 (Ab-360)                 | -44 |
| MSK1 (Phospho-Thr581)                 | MSK1 (Ab-581)                 | -24 |
| mTOR (Phospho-Ser2448)                | mTOR (Ab-2448)                | -14 |
| mTOR (Phospho-Ser2481)                | mTOR (Ab-2481)                | -29 |
| Myc (Phospho-Ser373)                  | Myc (Ab-373)                  | -32 |
| NFkB-p105/p50 (Phospho-Ser893)        | NFkB-p105/p50 (Ab-893)        | -17 |
| NFkB-p105/p50 (Phospho-Ser927)        | NFkB-p105/p50 (Ab-927)        | 21  |
| NFkB-p65 (Phospho-Ser529)             | NFkB-p65 (Ab-529)             | -20 |
| p130Cas (Phospho-Tyr165)              | p130Cas (Ab-165)              | -10 |
| p27Kip1 (Phospho-Thr187)              | p27Kip1 (Ab-187)              | 57  |
| p38 MAPK (Phospho-Tyr322)             | p38 MAPK (Ab-322)             | -33 |
| p53 (Phospho-Ser20)                   | p53 (Ab-20)                   | 12  |
| p53 (Phospho-Ser46)                   | p53 (Ab-46)                   | -11 |
| P70S6K (Phospho-Ser411)               | P70S6K (Ab-411)               | 11  |
| P90RSK (Phospho-Thr359/Ser363)        | P90RSK (Ab-359/363)           | -51 |
| PDGFR beta (Phospho-Tyr1021)          | PDGFR beta (Ab-1021)          | -26 |
| PKC alpha/beta II (Phospho-Thr638)    | PKC alpha/beta II (Ab-638)    | -27 |
| PKD1/PKC mu (Phospho-Ser910)          | PKD1/PKC mu (Ab-910)          | -25 |
| PKD1/PKC mu (Phospho-Tyr463)          | PKD1/PKC mu (Ab-463)          | -17 |
| Pyk2 (Phospho-Tyr402)                 | Pyk2 (Ab-402)                 | -15 |
| Raf1 (Phospho-Ser296)                 | Raf1 (Ab-296)                 | -35 |
| Raf1 (Phospho-Ser621)                 | Raf1 (Ab-621)                 | 10  |
| Raf1 (Phospho-Tyr341)                 | Raf1 (Ab-341)                 | 13  |
| S6 Ribosomal Protein (Phospho-Ser235) | S6 Ribosomal Protein (Ab-235) | -13 |
| Smad3 (Phospho-Thr179)                | Smad3 (Ab-179)                | 38  |
| Synapsin (Phospho-Ser62)              | Synapsin (Ab-62)              | 16  |
| Synaptotagmin (Phospho-Ser309)        | Synaptotagmin (Ab-309)        | -10 |
| Tau (Phospho-Thr205)                  | Tau (Ab-205)                  | 61  |
| Tuberin/TSC2 (Phospho-Thr1462)        | Tuberin/TSC2 (Ab-1462)        | 36  |
| VEGFR2 (Phospho-Tyr1175)              | VEGFR2 (Ab-1175)              | -28 |
| VEGFR2 (Phospho-Tyr1214)              | VEGFR2 (Ab-1214)              | -19 |

**Supplementary table 3** Microarray analysis of myoblasts grown on FN or Col. Mouse MuSC derived primary cells grown on either Col or FN for 72 h. Genes were selected based on a minimal log<sub>2</sub>-fold change of 0.5 and a Benjamini-Hochberg adjusted p-value of < 0.05. Data represents the mean of *n* = 3 microarray replicates per condition. Genes upregulated on FN have a positive log<sub>2</sub>-fold change, genes downregulated by FN have a negative log<sub>2</sub>-fold change.

| Probe ID     | Log fold change | Adjusted p value | Gene symbol | Entrez ID |
|--------------|-----------------|------------------|-------------|-----------|
| 1420344_x_at | 2.41            | 1.71E-05         | Gzmd        | 14941     |
| 1420343_at   | 2.20            | 6.17E-06         | Gzmd        | 14941     |
| 1455627_at   | 2.12            | 1.30E-05         | Col8a1      | 12837     |
| 1419706_a_at | 1.85            | 9.80E-06         | Akap12      | 83397     |
| 1435888_at   | 1.83            | 9.80E-06         | Egfr        | 13649     |
| 1424932_at   | 1.67            | 1.30E-05         | Egfr        | 13649     |
| 1416077_at   | 1.55            | 2.72E-05         | Adm         | 11535     |
| 1453282_at   | 1.54            | 2.37E-05         | Cxadr       | 13052     |
| 1449340_at   | 1.51            | 1.40E-05         | Sostdc1     | 66042     |
| 1426243_at   | 1.45            | 3.30E-05         | Cth         | 107869    |
| 1439897_at   | 1.44            | 1.71E-05         | Neb1        | 74103     |
| 1438452_at   | 1.44            | 2.99E-05         | Neb1        | 74103     |
| 1436719_at   | 1.43            | 3.13E-05         | Slc35f1     | 215085    |
| 1416779_at   | 1.41            | 8.87E-05         | Sdpr        | 20324     |
| 1460302_at   | 1.38            | 2.66E-04         | Thbs1       | 21825     |
| 1460250_at   | 1.37            | 2.76E-05         | Sostdc1     | 66042     |
| 1450387_s_at | 1.37            | 2.68E-05         | Ak4         | 11639     |
| 1418440_at   | 1.37            | 2.91E-05         | Col8a1      | 12837     |
| 1421856_at   | 1.36            | 4.15E-05         | S100a3      | 20197     |
| 1447839_x_at | 1.36            | 1.93E-04         | Adm         | 11535     |
| 1416740_at   | 1.35            | 2.26E-05         | Col5a1      | 12831     |
| 1427321_s_at | 1.34            | 2.89E-05         | Cxadr       | 13052     |
| 1455400_at   | 1.32            | 3.61E-05         | Ddah1       | 69219     |
| 1416554_at   | 1.32            | 2.76E-05         | Pdlim1      | 54132     |
| 1460215_at   | 1.30            | 1.42E-04         | Polr1a      | 20019     |
| 1419675_at   | 1.29            | 3.55E-04         | Ngf         | 18049     |
| 1421830_at   | 1.28            | 1.61E-04         | Ak4         | 11639     |
| 1443832_s_at | 1.28            | 8.69E-05         | Sdpr        | 20324     |
| 1429443_at   | 1.27            | 2.76E-05         | Cpne4       | 74020     |
| 1437671_x_at | 1.27            | 5.65E-04         | Prss23      | 76453     |
| 1450871_a_at | 1.26            | 5.77E-05         | Bcat1       | 12035     |
| 1421426_at   | 1.24            | 4.49E-04         | Hhip        | 15245     |
| 1435767_at   | 1.23            | 8.87E-05         | Scn3b       | 235281    |

|              |      |          |               |           |
|--------------|------|----------|---------------|-----------|
| 1426010_a_at | 1.23 | 7.48E-05 | Epb4.1l3      | 13823     |
| 1448021_at   | 1.22 | 2.01E-04 | Fam46c        | 74645     |
| 1431057_a_at | 1.20 | 3.57E-05 | Prss23        | 76453     |
| 1450783_at   | 1.19 | 3.89E-03 | Ifit1         | 15957     |
| 1454995_at   | 1.19 | 1.21E-04 | Ddah1         | 69219     |
| 1456523_at   | 1.19 | 5.77E-05 | Gm2115        | 100039239 |
| 1438133_a_at | 1.19 | 1.62E-04 | Cyr61         | 16007     |
| 1430111_a_at | 1.18 | 1.88E-04 | Bcat1         | 12035     |
| 1416778_at   | 1.17 | 1.05E-04 | Sdpr          | 20324     |
| 1421278_s_at | 1.17 | 1.69E-04 | Spta1         | 20739     |
| 1441030_at   | 1.17 | 2.88E-04 | Rai14         | 75646     |
| 1435014_at   | 1.17 | 4.88E-04 | Rab39b        | 67790     |
| 1422890_at   | 1.16 | 4.84E-04 | Pcdh18        | 73173     |
| 1442340_x_at | 1.16 | 5.12E-04 | Cyr61         | 16007     |
| 1429298_at   | 1.16 | 5.81E-05 | Ddah1         | 69219     |
| 1419062_at   | 1.15 | 6.82E-05 | Epb4.1l3      | 13823     |
| 1422889_at   | 1.14 | 4.83E-05 | Pcdh18        | 73173     |
| 1455277_at   | 1.14 | 8.95E-05 | Hhip          | 15245     |
| 1416039_x_at | 1.13 | 1.14E-04 | Cyr61         | 16007     |
| 1415832_at   | 1.10 | 2.64E-04 | Agtr2         | 11609     |
| 1435955_at   | 1.10 | 8.31E-04 | Siglecg       | 243958    |
| 1425155_x_at | 1.09 | 5.62E-04 | Csf1          | 12977     |
| 1450377_at   | 1.08 | 7.53E-04 | Thbs1         | 21825     |
| 1456344_at   | 1.07 | 1.10E-03 | Tnc           | 21923     |
| 1435338_at   | 1.06 | 7.73E-05 | Cdk6          | 12571     |
| 1450171_x_at | 1.06 | 8.99E-05 | Gzme          | 14942     |
| 1415978_at   | 1.06 | 3.07E-04 | Tubb3         | 22152     |
| 1454224_at   | 1.06 | 1.60E-04 | 2010300F17Rik | 69884     |
| 1423747_a_at | 1.06 | 2.66E-04 | Pdk1          | 228026    |
| 1420938_at   | 1.05 | 5.74E-04 | Hs6st2        | 50786     |
| 1455299_at   | 1.03 | 2.11E-04 | Vgll3         | 73569     |
| 1434479_at   | 1.02 | 9.30E-05 | Col5a1        | 12831     |
| 1450005_x_at | 1.01 | 2.24E-04 | Dlk2          | 106565    |
| 1441824_at   | 1.00 | 7.28E-04 | Mboat1        | 218121    |
| 1434678_at   | 1.00 | 4.88E-04 | Mbnl3         | 171170    |
| 1448288_at   | 1.00 | 1.76E-04 | Nfib          | 18028     |
| 1453125_at   | 1.00 | 1.62E-04 | Sox11         | 20666     |
| 1457823_at   | 0.99 | 4.90E-04 | Cyr61         | 16007     |
| 1442595_at   | 0.99 | 1.11E-04 | Gm2115        | 100039239 |
| 1453646_at   | 0.98 | 5.96E-04 | 3110005L21Rik | 73104     |
| 1427256_at   | 0.98 | 1.84E-04 | Vcan          | 13003     |
| 1451038_at   | 0.97 | 3.09E-04 | Apln          | 30878     |
| 1435323_a_at | 0.96 | 1.89E-04 | Mboat1        | 218121    |
| 1454877_at   | 0.96 | 1.42E-04 | Sertad4       | 214791    |
| 1460555_at   | 0.95 | 6.72E-04 | Fam65b        | 193385    |

|              |      |          |               |        |
|--------------|------|----------|---------------|--------|
| 1460330_at   | 0.95 | 1.69E-04 | Anxa3         | 11745  |
| 1448557_at   | 0.95 | 1.00E-03 | Fam13c        | 71721  |
| 1416357_a_at | 0.95 | 1.05E-03 | Mcam          | 84004  |
| 1436552_at   | 0.94 | 8.77E-04 | Jakmip2       | 76217  |
| 1454780_at   | 0.94 | 4.05E-04 | Galnt18       | 233733 |
| 1434645_at   | 0.93 | 4.88E-04 | C530008M17Rik | 320827 |
| 1453593_at   | 0.93 | 2.87E-04 | Vgll3         | 73569  |
| 1435207_at   | 0.93 | 1.43E-04 | Dixdc1        | 330938 |
| 1420807_a_at | 0.93 | 2.99E-04 | Dlk2          | 106565 |
| 1430596_s_at | 0.92 | 5.04E-04 | Vgll3         | 73569  |
| 1460666_a_at | 0.92 | 3.33E-04 | Ebf3          | 13593  |
| 1418773_at   | 0.92 | 4.63E-04 | Fads3         | 60527  |
| 1454834_at   | 0.90 | 2.93E-04 | Nfib          | 18028  |
| 1427680_a_at | 0.90 | 5.04E-04 | Nfib          | 18028  |
| 1416022_at   | 0.90 | 2.27E-04 | Fabp5         | 16592  |
| 1455699_at   | 0.90 | 7.75E-04 | Bcat1         | 12035  |
| 1423294_at   | 0.90 | 2.95E-04 | Mest          | 17294  |
| 1418379_s_at | 0.90 | 9.81E-04 | Gpr124        | 78560  |
| 1448594_at   | 0.90 | 2.33E-04 | Wisp1         | 22402  |
| 1454674_at   | 0.89 | 4.79E-04 | Fez1          | 235180 |
| 1418808_at   | 0.89 | 2.64E-04 | Rdh5          | 19682  |
| 1417156_at   | 0.89 | 2.54E-04 | Krt19         | 16669  |
| 1435265_at   | 0.89 | 2.66E-04 | Fbxo32        | 67731  |
| 1421694_a_at | 0.88 | 4.10E-04 | Vcan          | 13003  |
| 1455287_at   | 0.88 | 1.93E-04 | Cdk6          | 12571  |
| 1449314_at   | 0.88 | 6.78E-04 | Zfpm2         | 22762  |
| 1423505_at   | 0.87 | 2.72E-03 | Tagln         | 21345  |
| 1449145_a_at | 0.87 | 2.95E-04 | Cav1          | 12389  |
| 1448931_at   | 0.87 | 1.78E-03 | F2r1          | 14063  |
| 1424292_at   | 0.87 | 6.86E-04 | Depdc1a       | 76131  |
| 1435910_at   | 0.87 | 6.75E-04 | Fads3         | 60527  |
| 1416715_at   | 0.86 | 1.11E-03 | Gjb3          | 14620  |
| 1416342_at   | 0.86 | 2.27E-04 | Tnc           | 21923  |
| 1429372_at   | 0.85 | 3.07E-04 | Sox11         | 20666  |
| 1434052_at   | 0.85 | 1.62E-02 | AI593442      | 330941 |
| 1440083_at   | 0.85 | 1.48E-03 | A430061O12Rik | 319285 |
| 1434102_at   | 0.85 | 7.97E-04 | Nfib          | 18028  |
| 1449297_at   | 0.85 | 6.94E-04 | Casp12        | 12364  |
| 1433509_s_at | 0.84 | 8.36E-04 | Reep1         | 52250  |
| 1418981_at   | 0.84 | 4.86E-04 | Casp12        | 12364  |
| 1453002_at   | 0.83 | 5.45E-04 | Sox11         | 20666  |
| 1454969_at   | 0.83 | 4.00E-03 | Lypd6         | 320343 |
| 1429051_s_at | 0.83 | 4.03E-04 | Sox11         | 20666  |
| 1428136_at   | 0.83 | 5.04E-04 | Sfrp1         | 20377  |
| 1451064_a_at | 0.83 | 5.04E-04 | Psat1         | 107272 |

|              |      |          |          |        |
|--------------|------|----------|----------|--------|
| 1435750_at   | 0.83 | 1.02E-03 | Gchfr    | 320415 |
| 1424793_a_at | 0.83 | 2.42E-03 | Pbp2     | 76400  |
| 1448914_a_at | 0.83 | 6.55E-04 | Csf1     | 12977  |
| 1417300_at   | 0.83 | 4.88E-04 | Smpdl3b  | 100340 |
| 1417576_a_at | 0.83 | 9.22E-04 | Otub2    | 68149  |
| 1428492_at   | 0.82 | 3.67E-04 | Glipr2   | 384009 |
| 1434777_at   | 0.82 | 6.87E-04 | Mycl     | 16918  |
| 1416043_at   | 0.82 | 8.13E-04 | Nasp     | 50927  |
| 1453321_at   | 0.82 | 9.70E-03 | Fndc1    | 68655  |
| 1450047_at   | 0.82 | 5.68E-04 | Hs6st2   | 50786  |
| 1421277_at   | 0.82 | 6.98E-04 | Spta1    | 20739  |
| 1433776_at   | 0.81 | 4.42E-03 | Lhfp     | 108927 |
| 1422742_at   | 0.81 | 1.96E-03 | Hivep1   | 110521 |
| 1436545_at   | 0.81 | 8.29E-04 | Dtx4     | 207521 |
| 1440595_at   | 0.81 | 9.74E-04 | Epb4.1l3 | 13823  |
| 1424542_at   | 0.81 | 4.88E-04 | S100a4   | 20198  |
| 1455324_at   | 0.80 | 2.78E-03 | Plcx2    | 433022 |
| 1454649_at   | 0.80 | 1.60E-03 | Srd5a1   | 78925  |
| 1455421_x_at | 0.80 | 7.16E-03 | Fam131b  | 76156  |
| 1454672_at   | 0.79 | 4.49E-04 | Nefl     | 18039  |
| 1426319_at   | 0.79 | 7.79E-04 | Pdgfd    | 71785  |
| 1454607_s_at | 0.79 | 5.97E-04 | Psat1    | 107272 |
| 1433919_at   | 0.78 | 1.66E-03 | Asb4     | 65255  |
| 1454857_at   | 0.78 | 6.87E-04 | Rnf122   | 68867  |
| 1457707_at   | 0.77 | 6.02E-04 | Mctp2    | 244049 |
| 1436000_a_at | 0.77 | 4.67E-04 | Skp2     | 27401  |
| 1419149_at   | 0.77 | 1.11E-03 | Serpine1 | 18787  |
| 1417575_at   | 0.77 | 8.77E-04 | Otub2    | 68149  |
| 1419513_a_at | 0.77 | 8.04E-04 | Ect2     | 13605  |
| 1423748_at   | 0.77 | 4.88E-04 | Pdk1     | 228026 |
| 1439018_at   | 0.76 | 8.87E-04 | Fhdc1    | 229474 |
| 1436739_at   | 0.76 | 5.04E-04 | Agtr1a   | 11607  |
| 1434240_at   | 0.75 | 8.78E-04 | Ddias    | 74041  |
| 1426658_x_at | 0.75 | 7.70E-04 | Phgdh    | 236539 |
| 1421344_a_at | 0.75 | 6.18E-04 | Ajuba    | 16475  |
| 1422909_at   | 0.75 | 2.46E-03 | Smc6     | 67241  |
| 1432517_a_at | 0.75 | 1.30E-03 | Nnmt     | 18113  |
| 1455991_at   | 0.75 | 6.62E-04 | Ccbl2    | 229905 |
| 1438404_at   | 0.75 | 1.04E-03 | Rnf144a  | 108089 |
| 1438756_at   | 0.74 | 3.10E-03 | Ankrd29  | 225187 |
| 1444290_at   | 0.74 | 8.04E-04 | Steap2   | 74051  |
| 1452751_at   | 0.74 | 7.27E-04 | Ebf3     | 13593  |
| 1452115_a_at | 0.73 | 8.04E-04 | Plk4     | 20873  |
| 1426255_at   | 0.73 | 7.87E-04 | Nefl     | 18039  |
| 1423516_a_at | 0.73 | 2.48E-03 | Nid2     | 18074  |

|              |      |          |               |        |
|--------------|------|----------|---------------|--------|
| 1452818_at   | 0.73 | 9.09E-04 | Ttf2          | 74044  |
| 1442077_at   | 0.73 | 8.31E-04 | 2310076G05Rik | 76963  |
| 1435191_at   | 0.73 | 5.36E-03 | Cdsn          | 386463 |
| 1418969_at   | 0.73 | 9.70E-03 | Skp2          | 27401  |
| 1435701_at   | 0.73 | 1.53E-03 | Cypr1         | 224405 |
| 1435521_at   | 0.73 | 3.52E-03 | Msi2          | 76626  |
| 1428706_at   | 0.73 | 1.52E-03 | Cenpv         | 73139  |
| 1430685_at   | 0.73 | 9.04E-04 | Fam131b       | 76156  |
| 1434856_at   | 0.72 | 2.91E-02 | Ankrd44       | 329154 |
| 1456225_x_at | 0.72 | 1.69E-02 | Trib3         | 228775 |
| 1435486_at   | 0.72 | 2.68E-03 | Pak3          | 18481  |
| 1452361_at   | 0.72 | 1.38E-03 | Rnf20         | 109331 |
| 1424801_at   | 0.72 | 7.33E-04 | Enah          | 13800  |
| 1418126_at   | 0.72 | 5.51E-03 | Ccl5          | 20304  |
| 1434153_at   | 0.72 | 7.06E-04 | Shb           | 230126 |
| 1449949_a_at | 0.72 | 4.46E-03 | Cxadr         | 13052  |
| 1448593_at   | 0.72 | 9.48E-04 | Wisp1         | 22402  |
| 1427931_s_at | 0.71 | 8.93E-03 | Pdxk          | 216134 |
| 1450157_a_at | 0.71 | 9.02E-04 | Hmmr          | 15366  |
| 1418723_at   | 0.71 | 2.52E-03 | Lpar3         | 65086  |
| 1429734_at   | 0.71 | 1.72E-03 | Ddias         | 74041  |
| 1424938_at   | 0.71 | 1.25E-03 | Steap1        | 70358  |
| 1450700_at   | 0.71 | 1.73E-03 | Cdc42ep3      | 260409 |
| 1440770_at   | 0.71 | 2.49E-03 | Bcl2          | 12043  |
| 1430535_at   | 0.71 | 9.21E-04 | Tsc22d2       | 72033  |
| 1432826_a_at | 0.71 | 5.97E-03 | Cd80          | 12519  |
| 1452803_at   | 0.71 | 1.01E-03 | Glpr2         | 384009 |
| 1436585_at   | 0.71 | 3.59E-03 | BB182297      | 99463  |
| 1451418_a_at | 0.70 | 2.76E-03 | Spsb4         | 211949 |
| 1415848_at   | 0.70 | 8.56E-04 | Prl3d1        | 18775  |
| 1432013_a_at | 0.70 | 2.18E-03 | Mtfr2         | 71804  |
| 1455877_a_at | 0.70 | 3.61E-03 | Nanos1        | 332397 |
| 1437933_at   | 0.70 | 1.11E-02 | Hhip          | 15245  |
| 1433965_at   | 0.70 | 2.24E-03 | Atp8a1        | 11980  |
| 1448681_at   | 0.70 | 2.09E-03 | Il15ra        | 16169  |
| 1450886_at   | 0.70 | 1.53E-03 | Gsg2          | 14841  |
| 1429172_a_at | 0.70 | 7.93E-04 | Ncapg         | 54392  |
| 1438802_at   | 0.69 | 3.95E-03 | Foxp1         | 108655 |
| 1453332_at   | 0.69 | 8.42E-03 | Trappc13      | 66975  |
| 1451794_at   | 0.69 | 8.29E-03 | Tmcc3         | 319880 |
| 1418108_at   | 0.69 | 1.53E-03 | Rtkn2         | 170799 |
| 1433450_at   | 0.69 | 8.92E-04 | Cdk5r1        | 12569  |
| 1420563_at   | 0.69 | 7.13E-03 | Gria3         | 53623  |
| 1436790_a_at | 0.69 | 2.32E-03 | Sox11         | 20666  |
| 1438083_at   | 0.68 | 3.50E-03 | Hhip          | 15245  |



|              |      |          |               |        |
|--------------|------|----------|---------------|--------|
| 1429022_at   | 0.68 | 5.56E-03 | Adcyap1r1     | 11517  |
| 1450223_at   | 0.68 | 4.23E-03 | Apaf1         | 11783  |
| 1421851_at   | 0.68 | 5.37E-03 | Map1b         | 17755  |
| 1444026_at   | 0.68 | 1.11E-02 | AI593442      | 330941 |
| 1429658_a_at | 0.68 | 9.66E-04 | Smc2          | 14211  |
| 1433699_at   | 0.68 | 7.23E-03 | Tnfaip3       | 21929  |
| 1433608_at   | 0.68 | 1.85E-03 | Scfd2         | 212986 |
| 1452840_at   | 0.68 | 1.61E-03 | 1500009L16Rik | 69784  |
| 1425053_at   | 0.68 | 1.06E-03 | Isoc1         | 66307  |
| 1455197_at   | 0.68 | 2.27E-03 | Rnd1          | 223881 |
| 1425166_at   | 0.68 | 1.93E-03 | Rbl1          | 19650  |
| 1454708_at   | 0.67 | 1.88E-03 | Ablim1        | 226251 |
| 1427005_at   | 0.67 | 1.86E-03 | Plk2          | 20620  |
| 1451119_a_at | 0.67 | 1.26E-03 | Fbln1         | 14114  |
| 1449615_s_at | 0.67 | 3.59E-03 | Hdlbp         | 110611 |
| 1437935_at   | 0.67 | 1.02E-02 | Mei4          | 75033  |
| 1430965_at   | 0.67 | 1.19E-03 | 9430064K01Rik | 77294  |
| 1435462_at   | 0.66 | 4.00E-03 | Plcx2         | 433022 |
| 1424051_at   | 0.66 | 1.11E-03 | Col4a2        | 12827  |
| 1438699_at   | 0.66 | 3.94E-03 | Srd5a1        | 78925  |
| 1441055_at   | 0.66 | 1.77E-03 | Palm2         | 242481 |
| 1437621_x_at | 0.66 | 1.50E-03 | Phgdh         | 236539 |
| 1418736_at   | 0.66 | 1.73E-03 | B3galnt1      | 26879  |
| 1452035_at   | 0.66 | 1.58E-03 | Col4a1        | 12826  |
| 1428349_s_at | 0.66 | 3.98E-03 | Ebf3          | 13593  |
| 1436731_at   | 0.66 | 1.10E-02 | Zfp385b       | 241494 |
| 1423852_at   | 0.66 | 3.28E-03 | Shisa2        | 219134 |
| 1451287_s_at | 0.66 | 7.69E-03 | Aif1l         | 108897 |
| 1452050_at   | 0.66 | 5.56E-03 | Camk1d        | 227541 |
| 1442434_at   | 0.66 | 1.81E-03 | D8Ert82e      | 244418 |
| 1430427_a_at | 0.66 | 1.34E-02 | Pcdh18        | 73173  |
| 1454683_at   | 0.65 | 4.65E-03 | Sfswap        | 231769 |
| 1416969_at   | 0.65 | 2.29E-03 | Gtse1         | 29870  |
| 1450075_at   | 0.65 | 1.80E-03 | Polh          | 80905  |
| 1424524_at   | 0.65 | 1.70E-02 | Dram1         | 71712  |
| 1447259_at   | 0.65 | 3.43E-03 | Ank3          | 11735  |
| 1429628_at   | 0.65 | 3.91E-03 | Soga3         | 67412  |
| 1453683_a_at | 0.65 | 6.41E-03 | Cep55         | 74107  |
| 1419082_at   | 0.65 | 6.22E-03 | Serpinb2      | 18788  |
| 1437923_at   | 0.65 | 3.89E-03 | AI314760      | 106885 |
| 1439148_a_at | 0.65 | 1.39E-03 | Pfkl          | 18641  |
| 1418382_at   | 0.65 | 3.71E-03 | Apcdd1        | 494504 |
| 1437033_a_at | 0.65 | 1.26E-03 | Skp2          | 27401  |
| 1421141_a_at | 0.65 | 2.72E-03 | Foxp1         | 108655 |
| 1437910_at   | 0.65 | 1.48E-03 | Tmem39b       | 230770 |

|              |      |          |               |        |
|--------------|------|----------|---------------|--------|
| 1448943_at   | 0.64 | 3.13E-03 | Nrp1          | 18186  |
| 1422510_at   | 0.64 | 3.89E-03 | Ctdspl        | 69274  |
| 1449548_at   | 0.64 | 8.39E-03 | Efnb2         | 13642  |
| 1434208_at   | 0.64 | 3.98E-03 | Rnf169        | 108937 |
| 1435785_at   | 0.64 | 2.52E-03 | Ehd2          | 259300 |
| 1460574_at   | 0.64 | 7.34E-03 | Fat4          | 329628 |
| 1426990_at   | 0.64 | 1.31E-02 | Cubn          | 65969  |
| 1425658_at   | 0.64 | 1.66E-03 | Cd109         | 235505 |
| 1449070_x_at | 0.64 | 7.00E-03 | Apcdd1        | 494504 |
| 1455161_at   | 0.64 | 1.17E-02 | AI504432      | 229694 |
| 1453053_at   | 0.64 | 1.59E-03 | Cenpw         | 66311  |
| 1425248_a_at | 0.64 | 1.78E-02 | Tyro3         | 22174  |
| 1419838_s_at | 0.63 | 1.80E-03 | Plk4          | 20873  |
| 1456584_x_at | 0.63 | 2.54E-03 | Phgdh         | 236539 |
| 1454822_x_at | 0.63 | 1.63E-03 | Apcdd1        | 494504 |
| 1449699_s_at | 0.63 | 4.09E-03 | C330027C09Rik | 224171 |
| 1448541_at   | 0.63 | 2.22E-03 | Klc1          | 16593  |
| 1421624_a_at | 0.63 | 2.03E-03 | Enah          | 13800  |
| 1419254_at   | 0.63 | 3.69E-03 | Mthfd2        | 17768  |
| 1429682_at   | 0.63 | 1.21E-02 | Fam46c        | 74645  |
| 1420877_at   | 0.63 | 4.77E-03 | Sep-06        | 56526  |
| 1426348_at   | 0.63 | 1.92E-03 | Col4a1        | 12826  |
| 1441984_at   | 0.63 | 3.07E-03 | Clspn         | 269582 |
| 1425527_at   | 0.63 | 1.84E-03 | Prrx1         | 18933  |
| 1460336_at   | 0.63 | 1.09E-02 | Ppargc1a      | 19017  |
| 1415673_at   | 0.63 | 5.12E-03 | Psph          | 100678 |
| 1453227_at   | 0.63 | 3.38E-03 | Rhobtb3       | 73296  |
| 1450269_a_at | 0.62 | 1.53E-03 | Pfkl          | 18641  |
| 1451246_s_at | 0.62 | 2.27E-03 | Aurkb         | 20877  |
| 1418157_at   | 0.62 | 3.00E-03 | Nr2f1         | 13865  |
| 1448689_at   | 0.62 | 2.07E-03 | Rras2         | 66922  |
| 1456711_at   | 0.62 | 4.90E-02 | Maats1        | 320214 |
| 1454714_x_at | 0.62 | 2.94E-03 | Phgdh         | 236539 |
| 1438953_at   | 0.62 | 1.39E-02 | Figf          | 14205  |
| 1433966_x_at | 0.61 | 3.17E-03 | Asns          | 27053  |
| 1420858_at   | 0.61 | 1.70E-03 | Pkia          | 18767  |
| 1421072_at   | 0.61 | 9.84E-03 | Irx5          | 54352  |
| 1416299_at   | 0.61 | 2.48E-03 | Shcbp1        | 20419  |
| 1437858_at   | 0.61 | 3.30E-02 | Dpy19l3       | 233115 |
| 1428636_at   | 0.61 | 3.37E-03 | Steap2        | 74051  |
| 1451629_at   | 0.61 | 2.93E-03 | Lbh           | 77889  |
| 1418326_at   | 0.61 | 3.49E-03 | Slc7a5        | 20539  |
| 1434748_at   | 0.61 | 2.25E-03 | Ckap2         | 80986  |
| 1426965_at   | 0.61 | 2.63E-03 | Rap2a         | 76108  |
| 1420876_a_at | 0.61 | 3.56E-03 | Sep-06        | 56526  |

|              |      |          |          |        |
|--------------|------|----------|----------|--------|
| 1436543_at   | 0.61 | 3.24E-03 | Gtpbp10  | 207704 |
| 1449219_at   | 0.61 | 2.62E-02 | Fads3    | 60527  |
| 1436514_at   | 0.60 | 2.48E-03 | Gpc4     | 14735  |
| 1450541_at   | 0.60 | 3.32E-03 | Pvt1     | 19296  |
| 1422683_at   | 0.60 | 1.63E-02 | Irak1bp1 | 65099  |
| 1435615_at   | 0.60 | 1.45E-02 | Zfp365   | 216049 |
| 1427436_at   | 0.60 | 2.37E-03 | Six2     | 20472  |
| 1429660_s_at | 0.60 | 8.05E-03 | Smc2     | 14211  |
| 1455899_x_at | 0.60 | 2.72E-03 | Socs3    | 12702  |
| 1423104_at   | 0.60 | 2.52E-03 | Irs1     | 16367  |
| 1418820_s_at | 0.60 | 1.67E-02 | Zcchc10  | 67966  |
| 1417785_at   | 0.60 | 1.97E-02 | Pla1a    | 85031  |
| 1421088_at   | 0.60 | 2.01E-03 | Gpc4     | 14735  |
| 1424511_at   | 0.60 | 2.01E-03 | Aurka    | 20878  |
| 1423614_at   | 0.60 | 6.44E-03 | Lrrc8c   | 100604 |
| 1423055_at   | 0.59 | 3.87E-03 | Nsg1     | 18196  |
| 1428304_at   | 0.59 | 9.23E-03 | Esco2    | 71988  |
| 1415904_at   | 0.59 | 2.59E-03 | Lpl      | 16956  |
| 1431358_at   | 0.59 | 1.83E-02 | Parpbp   | 75317  |
| 1449176_a_at | 0.59 | 7.84E-03 | Dck      | 13178  |
| 1448944_at   | 0.59 | 5.36E-03 | Nrp1     | 18186  |
| 1423422_at   | 0.59 | 7.82E-03 | Asb4     | 65255  |
| 1457687_at   | 0.59 | 3.09E-03 | Bcl2     | 12043  |
| 1433573_x_at | 0.59 | 2.79E-03 | Prss2    | 22072  |
| 1423350_at   | 0.59 | 5.68E-03 | Socs5    | 56468  |
| 1416558_at   | 0.59 | 2.25E-03 | Melk     | 17279  |
| 1451342_at   | 0.59 | 8.38E-03 | Spon1    | 233744 |
| 1417240_at   | 0.59 | 2.28E-03 | Zyx      | 22793  |
| 1451095_at   | 0.59 | 4.71E-03 | Asns     | 27053  |
| 1424875_at   | 0.59 | 8.24E-03 | Spg20    | 229285 |
| 1456424_s_at | 0.59 | 4.45E-03 | Pltp     | 18830  |
| 1436858_at   | 0.59 | 3.37E-03 | Mbnl2    | 105559 |
| 1452682_at   | 0.59 | 4.88E-03 | Fam122b  | 78755  |
| 1428279_a_at | 0.58 | 1.64E-02 | Atxn7l1  | 380753 |
| 1432022_at   | 0.58 | 2.79E-03 | Arhgap31 | 12549  |
| 1436194_at   | 0.58 | 5.48E-03 | Preid2   | 77619  |
| 1416072_at   | 0.58 | 1.72E-02 | Cd34     | 12490  |
| 1454927_at   | 0.58 | 1.11E-02 | Zfp41    | 22701  |
| 1448132_at   | 0.58 | 5.12E-03 | Slc19a1  | 20509  |
| 1421917_at   | 0.58 | 5.29E-03 | Pdgfra   | 18595  |
| 1436309_at   | 0.58 | 3.88E-03 | Neto2    | 74513  |
| 1420859_at   | 0.58 | 2.49E-03 | Pkia     | 18767  |
| 1426621_a_at | 0.58 | 7.11E-03 | Ppp2r2b  | 72930  |
| 1430634_a_at | 0.58 | 7.18E-03 | Pfkip    | 56421  |
| 1429637_at   | 0.58 | 7.95E-03 | Fam198b  | 68659  |

|              |      |          |               |           |
|--------------|------|----------|---------------|-----------|
| 1452315_at   | 0.58 | 4.86E-03 | Kif11         | 16551     |
| 1422540_at   | 0.58 | 3.24E-03 | Fbln1         | 14114     |
| 1417511_at   | 0.58 | 3.51E-03 | Lyar          | 17089     |
| 1422642_at   | 0.58 | 4.93E-03 | Cdc42ep3      | 260409    |
| 1439833_at   | 0.58 | 3.75E-03 | Sep-03        | 24050     |
| 1424556_at   | 0.58 | 6.30E-03 | Pycr1         | 209027    |
| 1418377_a_at | 0.58 | 2.78E-03 | Siva1         | 30954     |
| 1457042_at   | 0.57 | 5.99E-03 | Al256396      | 100503463 |
| 1437549_at   | 0.57 | 2.61E-03 | 2810408111Rik | 69941     |
| 1435554_at   | 0.57 | 7.21E-03 | Tmcc3         | 319880    |
| 1452458_s_at | 0.57 | 8.38E-03 | Lrr1          | 69706     |
| 1417911_at   | 0.57 | 2.87E-03 | Ccna2         | 12428     |
| 1436826_at   | 0.57 | 4.38E-03 | Tmtc3         | 237500    |
| 1429049_at   | 0.57 | 2.94E-03 | Nuak2         | 74137     |
| 1431430_s_at | 0.57 | 4.88E-03 | Trim59        | 66949     |
| 1436648_at   | 0.57 | 2.91E-02 | Nanos1        | 332397    |
| 1433623_at   | 0.57 | 1.75E-02 | Zfp367        | 238673    |
| 1429871_at   | 0.57 | 3.47E-02 | Hmmr          | 15366     |
| 1460247_a_at | 0.57 | 3.50E-03 | Skp2          | 27401     |
| 1434728_at   | 0.57 | 6.17E-03 | Gria3         | 53623     |
| 1417963_at   | 0.57 | 1.70E-02 | Pltp          | 18830     |
| 1420988_at   | 0.57 | 1.09E-02 | Polh          | 80905     |
| 1426519_at   | 0.57 | 6.64E-03 | P4ha1         | 18451     |
| 1453012_at   | 0.57 | 3.59E-03 | Tsc22d2       | 72033     |
| 1451532_s_at | 0.57 | 3.01E-03 | Steap1        | 70358     |
| 1443807_x_at | 0.57 | 7.09E-03 | Ccnf          | 12449     |
| 1428069_at   | 0.57 | 4.43E-03 | Cdca7         | 66953     |
| 1459749_s_at | 0.57 | 1.22E-02 | Fat4          | 329628    |
| 1428480_at   | 0.57 | 2.77E-03 | Cdca8         | 52276     |
| 1421349_x_at | 0.57 | 1.19E-02 | Cend1         | 57754     |
| 1418919_at   | 0.56 | 2.94E-03 | Sgol1         | 72415     |
| 1455523_at   | 0.56 | 1.03E-02 | Cstf2         | 108062    |
| 1439740_s_at | 0.56 | 5.52E-03 | Uck2          | 80914     |
| 1425850_a_at | 0.56 | 4.29E-03 | Nek6          | 59126     |
| 1425293_a_at | 0.56 | 7.95E-03 | Zcchc18       | 66995     |
| 1426580_at   | 0.56 | 4.00E-03 | Plk4          | 20873     |
| 1452270_s_at | 0.56 | 7.21E-03 | Cubn          | 65969     |
| 1448754_at   | 0.56 | 5.01E-03 | Rbp1          | 19659     |
| 1415836_at   | 0.56 | 5.37E-03 | Aldh18a1      | 56454     |
| 1416701_at   | 0.56 | 3.58E-03 | Rnd3          | 74194     |
| 1423524_at   | 0.56 | 8.38E-03 | Mastl         | 67121     |
| 1416741_at   | 0.56 | 7.10E-03 | Col5a1        | 12831     |
| 1434423_at   | 0.56 | 7.00E-03 | Gulp1         | 70676     |
| 1429088_at   | 0.56 | 5.03E-03 | Lbh           | 77889     |
| 1425753_a_at | 0.56 | 4.05E-03 | Ung           | 22256     |

|              |      |          |               |        |
|--------------|------|----------|---------------|--------|
| 1448961_at   | 0.56 | 5.71E-03 | Plscr2        | 18828  |
| 1428615_at   | 0.56 | 4.57E-03 | Lpar6         | 67168  |
| 1455711_at   | 0.56 | 3.50E-03 | Dtx4          | 207521 |
| 1446560_at   | 0.56 | 9.30E-03 | Prss23        | 76453  |
| 1416042_s_at | 0.56 | 3.51E-03 | Nasp          | 50927  |
| 1434116_at   | 0.55 | 5.54E-03 | Cbx2          | 12416  |
| 1415829_at   | 0.55 | 1.22E-02 | Lbr           | 98386  |
| 1424800_at   | 0.55 | 4.14E-03 | Enah          | 13800  |
| 1431074_a_at | 0.55 | 2.46E-02 | Pitpnc1       | 71795  |
| 1418617_x_at | 0.55 | 9.90E-03 | Clgn          | 12745  |
| 1423813_at   | 0.55 | 4.81E-03 | Kif22         | 110033 |
| 1460741_x_at | 0.55 | 2.14E-02 | D17Wsu92e     | 224647 |
| 1437753_at   | 0.55 | 8.62E-03 | Faxc          | 76132  |
| 1431056_a_at | 0.55 | 4.87E-03 | Lpl           | 16956  |
| 1450625_at   | 0.55 | 1.82E-02 | Col5a2        | 12832  |
| 1449708_s_at | 0.55 | 4.01E-03 | Chek1         | 12649  |
| 1451602_at   | 0.55 | 6.64E-03 | Snx6          | 72183  |
| 1455888_at   | 0.55 | 6.85E-03 | Lingo2        | 242384 |
| 1429299_at   | 0.55 | 2.69E-02 | Ddah1         | 69219  |
| 1453783_at   | 0.55 | 2.00E-02 | Pura          | 19290  |
| 1417976_at   | 0.55 | 5.41E-03 | Ada           | 11486  |
| 1454745_at   | 0.55 | 3.32E-03 | Arhgap29      | 214137 |
| 1430030_at   | 0.55 | 5.17E-03 | 5330426P16Rik | 68190  |
| 1427313_at   | 0.55 | 1.04E-02 | Ptgir         | 19222  |
| 1454904_at   | 0.55 | 1.38E-02 | Mtm1          | 17772  |
| 1424046_at   | 0.55 | 6.44E-03 | Bub1          | 12235  |
| 1428861_at   | 0.55 | 3.63E-03 | Filip1l       | 78749  |
| 1430154_at   | 0.55 | 6.15E-03 | Vps13a        | 271564 |
| 1435597_at   | 0.55 | 3.56E-03 | Atad5         | 237877 |
| 1426872_at   | 0.55 | 4.32E-03 | Fcgbp         | 215384 |
| 1417164_at   | 0.55 | 6.02E-03 | Dusp10        | 63953  |
| 1436119_at   | 0.55 | 2.23E-02 | Aldh1l2       | 216188 |
| 1434601_at   | 0.55 | 1.64E-02 | Amigo2        | 105827 |
| 1421142_s_at | 0.55 | 1.63E-02 | Foxp1         | 108655 |
| 1421317_x_at | 0.55 | 9.03E-03 | Myb           | 17863  |
| 1422135_at   | 0.55 | 1.04E-02 | Zfp146        | 26465  |
| 1422814_at   | 0.54 | 4.25E-03 | Aspm          | 12316  |
| 1428485_at   | 0.54 | 1.94E-02 | Car12         | 76459  |
| 1434911_s_at | 0.54 | 6.77E-03 | Arhgap19      | 71085  |
| 1431893_a_at | 0.54 | 4.62E-03 | Pdss1         | 56075  |
| 1448660_at   | 0.54 | 5.29E-03 | Arhgdig       | 14570  |
| 1458427_at   | 0.54 | 4.33E-03 | Brip1         | 237911 |
| 1431101_a_at | 0.54 | 8.38E-03 | Srd5a1        | 78925  |
| 1456077_x_at | 0.54 | 7.13E-03 | Cdc25c        | 12532  |
| 1439040_at   | 0.54 | 8.97E-03 | Cenpe         | 229841 |

|              |      |          |               |        |
|--------------|------|----------|---------------|--------|
| 1436725_at   | 0.54 | 7.26E-03 | Arhgef39      | 230098 |
| 1456395_at   | 0.54 | 3.96E-02 | Ppargc1a      | 19017  |
| 1425837_a_at | 0.54 | 5.42E-03 | Ccrn4l        | 12457  |
| 1422546_at   | 0.54 | 4.88E-03 | Ilf3          | 16201  |
| 1430150_at   | 0.54 | 2.00E-02 | Dcp2          | 70640  |
| 1439012_a_at | 0.54 | 8.78E-03 | Dck           | 13178  |
| 1433974_at   | 0.54 | 3.61E-03 | Sephs1        | 109079 |
| 1450496_a_at | 0.54 | 3.67E-03 | Ska1          | 66468  |
| 1416432_at   | 0.54 | 5.17E-03 | Pfkfb3        | 170768 |
| 1422535_at   | 0.54 | 4.14E-03 | Ccne2         | 12448  |
| 1460602_at   | 0.54 | 6.88E-03 | Dlc1          | 50768  |
| 1455852_at   | 0.54 | 4.11E-03 | Nsl1          | 381318 |
| 1442134_at   | 0.54 | 5.80E-03 | Prr11         | 270906 |
| 1419083_at   | 0.54 | 6.32E-03 | Tnfsf11       | 21943  |
| 1449061_a_at | 0.54 | 4.97E-03 | Prim1         | 19075  |
| 1418027_at   | 0.54 | 9.62E-03 | Exo1          | 26909  |
| 1428207_at   | 0.54 | 5.92E-03 | Bcl7a         | 77045  |
| 1427498_a_at | 0.53 | 7.23E-03 | Spag5         | 54141  |
| 1447547_at   | 0.53 | 8.88E-03 | Ltbp1         | 268977 |
| 1436037_at   | 0.53 | 6.59E-03 | Itga4         | 16401  |
| 1418380_at   | 0.53 | 1.56E-02 | Terf1         | 21749  |
| 1427940_s_at | 0.53 | 8.93E-03 | Mycbp         | 56309  |
| 1437333_x_at | 0.53 | 6.88E-03 | Aldh18a1      | 56454  |
| 1453293_a_at | 0.53 | 9.42E-03 | 2810408A11Rik | 70419  |
| 1428921_at   | 0.53 | 1.01E-02 | Mplkip        | 66308  |
| 1435222_at   | 0.53 | 1.09E-02 | Foxp1         | 108655 |
| 1421172_at   | 0.53 | 5.98E-03 | Adam12        | 11489  |
| 1424959_at   | 0.53 | 1.20E-02 | Anxa13        | 69787  |
| 1426117_a_at | 0.53 | 4.45E-03 | Slc19a2       | 116914 |
| 1438434_at   | 0.53 | 5.68E-03 | Arhgap11a     | 228482 |
| 1451419_at   | 0.53 | 6.42E-03 | Spsb4         | 211949 |
| 1439049_at   | 0.53 | 3.88E-03 | Dph5          | 69740  |
| 1434756_at   | 0.53 | 5.21E-03 | 5430421B17    | 330593 |
| 1425154_a_at | 0.53 | 9.03E-03 | Csf1          | 12977  |
| 1424128_x_at | 0.53 | 7.00E-03 | Aurkb         | 20877  |
| 1425051_at   | 0.53 | 3.12E-02 | Isoc1         | 66307  |
| 1415917_at   | 0.53 | 6.13E-03 | Mthfd1        | 108156 |
| 1440050_at   | 0.53 | 8.68E-03 | Hbs1l         | 56422  |
| 1424594_at   | 0.53 | 1.06E-02 | Samd4         | 74480  |
| 1416258_at   | 0.53 | 4.65E-03 | Tk1           | 21877  |
| 1422252_a_at | 0.53 | 4.81E-03 | Cdc25c        | 12532  |
| 1421291_at   | 0.53 | 5.83E-03 | Il18rap       | 16174  |
| 1442359_at   | 0.53 | 4.12E-03 | Steap2        | 74051  |
| 1453343_s_at | 0.53 | 8.38E-03 | Vrk2          | 69922  |
| 1434364_at   | 0.53 | 2.33E-02 | Map3k14       | 53859  |

|              |      |          |          |        |
|--------------|------|----------|----------|--------|
| 1420707_a_at | 0.52 | 1.84E-02 | Traip    | 22036  |
| 1419301_at   | 0.52 | 1.78E-02 | Fzd4     | 14366  |
| 1453985_at   | 0.52 | 8.29E-03 | Ercc6l2  | 76251  |
| 1426363_x_at | 0.52 | 6.61E-03 | H2afy2   | 404634 |
| 1458480_at   | 0.52 | 1.05E-02 | Topbp1   | 235559 |
| 1455242_at   | 0.52 | 7.77E-03 | Foxp1    | 108655 |
| 1437325_x_at | 0.52 | 6.61E-03 | Aldh18a1 | 56454  |
| 1455820_x_at | 0.52 | 5.88E-03 | Scarb1   | 20778  |
| 1422437_at   | 0.52 | 4.78E-03 | Col5a2   | 12832  |
| 1444583_at   | 0.52 | 8.88E-03 | Nasp     | 50927  |
| 1434809_at   | 0.52 | 9.70E-03 | Arhgap28 | 268970 |
| 1426538_a_at | 0.52 | 5.52E-03 | Trp53    | 22059  |
| 1425927_a_at | 0.52 | 6.59E-03 | Atf5     | 107503 |
| 1450920_at   | 0.52 | 4.57E-03 | Ccnb2    | 12442  |
| 1448310_at   | 0.52 | 1.48E-02 | Ick      | 56542  |
| 1421852_at   | 0.52 | 1.39E-02 | Kcnk5    | 16529  |
| 1452872_at   | 0.52 | 5.29E-03 | Ank3     | 11735  |
| 1416118_at   | 0.52 | 8.75E-03 | Trim59   | 66949  |
| 1423714_at   | 0.52 | 5.63E-03 | Asf1b    | 66929  |
| 1423699_at   | 0.52 | 1.63E-02 | Ncaph2   | 52683  |
| 1419501_at   | 0.52 | 1.10E-02 | Polk     | 27015  |
| 1444076_at   | 0.52 | 6.19E-03 | Zfp81    | 224694 |
| 1424768_at   | 0.52 | 8.21E-03 | Cald1    | 109624 |
| 1455070_at   | 0.52 | 4.87E-03 | Dcp2     | 70640  |
| 1434400_at   | 0.52 | 5.10E-03 | Tgif2    | 228839 |
| 1422979_at   | 0.52 | 1.20E-02 | Suv39h2  | 64707  |
| 1419677_at   | 0.52 | 6.49E-03 | Masp1    | 17174  |
| 1423771_at   | 0.51 | 5.29E-03 | Prkcdp   | 109042 |
| 1439774_at   | 0.51 | 8.61E-03 | Prrx1    | 18933  |
| 1424202_at   | 0.51 | 6.44E-03 | Seh1l    | 72124  |
| 1421746_a_at | 0.51 | 7.51E-03 | Fbxo17   | 50760  |
| 1430339_at   | 0.51 | 7.76E-03 | Efcab11  | 78767  |
| 1435836_at   | 0.51 | 6.59E-03 | Pdk1     | 228026 |
| 1435060_at   | 0.51 | 2.10E-02 | Tmod2    | 50876  |
| 1425206_a_at | 0.51 | 4.28E-02 | Ube3a    | 22215  |
| 1434700_at   | 0.51 | 2.76E-02 | G2e3     | 217558 |
| 1416155_at   | 0.51 | 5.29E-03 | Hmgb3    | 15354  |
| 1448506_at   | 0.51 | 7.32E-03 | Serpina6 | 12401  |
| 1421838_at   | 0.51 | 2.26E-02 | Rps18    | 20084  |
| 1449060_at   | 0.51 | 1.33E-02 | Kif2c    | 73804  |
| 1416124_at   | 0.51 | 9.98E-03 | Ccnd2    | 12444  |
| 1417522_at   | 0.51 | 7.56E-03 | Fbxo32   | 67731  |
| 1456891_at   | 0.51 | 2.43E-02 | Dennd2c  | 329727 |
| 1435221_at   | 0.51 | 5.91E-03 | Foxp1    | 108655 |
| 1433782_at   | 0.51 | 7.33E-03 | Cldn12   | 64945  |

|              |       |          |               |        |
|--------------|-------|----------|---------------|--------|
| 1434699_at   | 0.51  | 5.36E-03 | G2e3          | 217558 |
| 1445765_at   | 0.51  | 2.13E-02 | 9430011C21Rik | 319791 |
| 1431332_a_at | 0.51  | 1.47E-02 | Terf1         | 21749  |
| 1437378_x_at | 0.51  | 5.92E-03 | Scarb1        | 20778  |
| 1429156_at   | 0.51  | 6.75E-03 | Cenpw         | 66311  |
| 1450842_a_at | 0.51  | 4.88E-03 | Cenpa         | 12615  |
| 1424186_at   | 0.51  | 1.10E-02 | Ccdc80        | 67896  |
| 1432417_a_at | 0.51  | 1.88E-02 | Tspan2        | 70747  |
| 1435753_a_at | 0.51  | 7.49E-03 | Nucks1        | 98415  |
| 1453851_a_at | 0.51  | 6.75E-03 | Gadd45g       | 23882  |
| 1435132_at   | 0.51  | 2.82E-02 | Disp1         | 68897  |
| 1453748_a_at | 0.51  | 1.13E-02 | Kif23         | 71819  |
| 1427541_x_at | 0.51  | 7.54E-03 | Hmmr          | 15366  |
| 1418026_at   | 0.51  | 5.28E-03 | Exo1          | 26909  |
| 1449125_at   | 0.51  | 4.15E-02 | Tnfaip81      | 66443  |
| 1451347_at   | 0.51  | 1.14E-02 | Ino80e        | 233875 |
| 1450025_at   | 0.51  | 1.05E-02 | Pard6g        | 93737  |
| 1434469_at   | 0.51  | 5.92E-03 | Otud4         | 73945  |
| 1449207_a_at | 0.51  | 5.15E-03 | Kif20a        | 19348  |
| 1418815_at   | 0.51  | 1.10E-02 | Cdh2          | 12558  |
| 1437187_at   | 0.51  | 5.43E-03 | E2f7          | 52679  |
| 1441315_s_at | 0.51  | 5.33E-03 | Slc19a2       | 116914 |
| 1426640_s_at | 0.51  | 1.13E-02 | Trib2         | 217410 |
| 1421265_a_at | 0.51  | 6.48E-03 | Rbm38         | 56190  |
| 1454997_at   | 0.51  | 1.14E-02 | Msr3          | 320183 |
| 1436173_at   | 0.51  | 8.68E-03 | Dlc1          | 50768  |
| 1437370_at   | 0.50  | 5.35E-03 | Sgol2         | 68549  |
| 1459104_at   | 0.50  | 9.57E-03 | Bub3          | 12237  |
| 1451382_at   | 0.50  | 4.42E-02 | Chac1         | 69065  |
| 1444272_at   | 0.50  | 4.24E-02 | Intu          | 380614 |
| 1450156_a_at | 0.50  | 8.82E-03 | Hmmr          | 15366  |
| 1429665_at   | 0.50  | 1.19E-02 | Haus6         | 230376 |
| 1429557_at   | 0.50  | 1.12E-02 | Mcm8          | 66634  |
| 1424927_at   | 0.50  | 2.05E-02 | Glpr1         | 73690  |
| 1429171_a_at | 0.50  | 5.33E-03 | Ncapg         | 54392  |
| 1450397_at   | 0.50  | 8.88E-03 | Map1b         | 17755  |
| 1417273_at   | 0.50  | 7.37E-03 | Pdk4          | 27273  |
| 1415772_at   | 0.50  | 5.56E-03 | Ncl           | 17975  |
| 1436723_at   | 0.50  | 1.19E-02 | Cenpi         | 102920 |
| 1417398_at   | 0.50  | 7.23E-03 | Rras2         | 66922  |
| 1419152_at   | 0.50  | 6.27E-03 | 2810417H13Rik | 68026  |
| 1430332_a_at | -0.50 | 6.88E-03 | Gusb          | 110006 |
| 1424652_at   | -0.50 | 7.52E-03 | Eva1a         | 232146 |
| 1438561_x_at | -0.50 | 2.15E-02 | Tmem180       | 75146  |
| 1426477_at   | -0.50 | 7.19E-03 | Rasa1         | 218397 |



|              |       |          |               |        |
|--------------|-------|----------|---------------|--------|
| 1418710_at   | -0.50 | 2.63E-02 | Cd59a         | 12509  |
| 1435074_at   | -0.50 | 1.31E-02 | Tmem106b      | 71900  |
| 1451196_at   | -0.50 | 5.18E-03 | Ypel5         | 383295 |
| 1455050_at   | -0.50 | 4.74E-02 | Vstm4         | 320736 |
| 1438993_a_at | -0.50 | 6.80E-03 | Atp6v1d       | 73834  |
| 1439499_at   | -0.50 | 1.23E-02 | AA415398      | 433752 |
| 1448816_at   | -0.50 | 1.46E-02 | Ptgis         | 19223  |
| 1435967_s_at | -0.50 | 5.53E-03 | Hibadh        | 58875  |
| 1426745_at   | -0.50 | 6.51E-03 | Rnasek        | 52898  |
| 1448233_at   | -0.50 | 6.49E-03 | Prnp          | 19122  |
| 1430448_at   | -0.50 | 1.53E-02 | 6720418B01Rik | 77892  |
| 1460234_at   | -0.50 | 1.05E-02 | Wdr81         | 192652 |
| 1454746_at   | -0.50 | 7.93E-03 | Plekhn1       | 353047 |
| 1454788_at   | -0.50 | 5.05E-03 | Arl4c         | 320982 |
| 1423468_at   | -0.50 | 7.37E-03 | Steap3        | 68428  |
| 1435467_at   | -0.50 | 5.68E-03 | Fgd6          | 13998  |
| 1447713_at   | -0.50 | 5.20E-03 | Tpm1          | 22003  |
| 1438217_at   | -0.50 | 8.61E-03 | Rbfox1        | 268859 |
| 1428647_at   | -0.50 | 6.85E-03 | Pbx1          | 18514  |
| 1446689_at   | -0.51 | 1.89E-02 | Nlrc3         | 268857 |
| 1438540_at   | -0.51 | 1.49E-02 | Col25a1       | 77018  |
| 1434559_at   | -0.51 | 1.75E-02 | Stx3          | 20908  |
| 1455506_at   | -0.51 | 9.28E-03 | Slc25a34      | 384071 |
| 1418982_at   | -0.51 | 1.27E-02 | Cebpa         | 12606  |
| 1422039_at   | -0.51 | 1.76E-02 | Tnfrsf22      | 79202  |
| 1438755_at   | -0.51 | 1.92E-02 | C80068        | 97810  |
| 1450027_at   | -0.51 | 5.74E-03 | Sdc3          | 20970  |
| 1456189_x_at | -0.51 | 1.45E-02 | Ltbp3         | 16998  |
| 1436392_s_at | -0.51 | 1.05E-02 | Tfap2c        | 21420  |
| 1422573_at   | -0.51 | 6.91E-03 | Ampd3         | 11717  |
| 1448986_x_at | -0.51 | 1.22E-02 | Dnase2a       | 13423  |
| 1418097_a_at | -0.51 | 1.33E-02 | Crlf2         | 57914  |
| 1429722_at   | -0.51 | 8.75E-03 | Zbtb4         | 75580  |
| 1451280_at   | -0.51 | 1.04E-02 | Arpp21        | 74100  |
| 1433589_at   | -0.51 | 5.18E-03 | Fam21         | 28006  |
| 1422974_at   | -0.51 | 5.16E-03 | Nt5e          | 23959  |
| 1434046_at   | -0.51 | 1.70E-02 | AA467197      | 433470 |
| 1435003_at   | -0.51 | 7.15E-03 | Pi4ka         | 224020 |
| 1433775_at   | -0.51 | 5.29E-03 | C77080        | 97130  |
| 1427186_a_at | -0.51 | 7.54E-03 | Mef2a         | 17258  |
| 1432848_a_at | -0.51 | 5.30E-03 | Frmf8         | 67457  |
| 1429433_at   | -0.51 | 6.17E-03 | Prrc2c        | 226562 |
| 1443392_at   | -0.51 | 1.59E-02 | Trpv1         | 193034 |
| 1421867_at   | -0.51 | 5.49E-03 | Nr3c1         | 14815  |
| 1431810_a_at | -0.51 | 4.13E-02 | Tmco4         | 77056  |

|              |       |          |               |        |
|--------------|-------|----------|---------------|--------|
| 1438892_at   | -0.51 | 6.80E-03 | Dep1          | 170624 |
| 1427535_s_at | -0.51 | 5.21E-03 | Obsl1         | 98733  |
| 1417329_at   | -0.51 | 5.39E-03 | Slc23a2       | 54338  |
| 1432606_at   | -0.51 | 1.99E-02 | 2610012C04Rik | 70299  |
| 1442726_s_at | -0.51 | 2.92E-02 | Al845619      | 103846 |
| 1438609_x_at | -0.51 | 3.55E-02 | Tnni2         | 21953  |
| 1434115_at   | -0.51 | 7.49E-03 | Cdh13         | 12554  |
| 1426540_at   | -0.51 | 7.52E-03 | Endod1        | 71946  |
| 1426337_a_at | -0.51 | 8.12E-03 | Tead4         | 21679  |
| 1429814_at   | -0.51 | 1.09E-02 | Pank1         | 75735  |
| 1445127_at   | -0.51 | 1.09E-02 | Ccbe1         | 320924 |
| 1444432_at   | -0.52 | 1.30E-02 | D330040H18Rik | 320847 |
| 1438910_a_at | -0.52 | 5.69E-03 | Stom          | 13830  |
| 1437545_at   | -0.52 | 1.90E-02 | Rcor1         | 217864 |
| 1423551_at   | -0.52 | 1.05E-02 | Cdh13         | 12554  |
| 1453424_at   | -0.52 | 6.59E-03 | Fyco1         | 17281  |
| 1423780_at   | -0.52 | 5.78E-03 | Hibadh        | 58875  |
| 1446741_at   | -0.52 | 2.38E-02 | Gm5463        | 432868 |
| 1453269_at   | -0.52 | 2.93E-02 | Unc5b         | 107449 |
| 1451621_at   | -0.52 | 5.60E-03 | Desi2         | 78825  |
| 1460409_at   | -0.52 | 1.05E-02 | Cpt1a         | 12894  |
| 1449006_at   | -0.52 | 1.09E-02 | Gla           | 11605  |
| 1451506_at   | -0.52 | 9.12E-03 | Mef2c         | 17260  |
| 1439450_x_at | -0.52 | 1.55E-02 | A230046K03Rik | 319277 |
| 1419652_s_at | -0.52 | 6.75E-03 | Nkain1        | 67149  |
| 1418074_at   | -0.52 | 2.00E-02 | St6galnac4    | 20448  |
| 1452521_a_at | -0.52 | 4.88E-03 | Plaur         | 18793  |
| 1426539_at   | -0.52 | 6.19E-03 | Usp11         | 236733 |
| 1417191_at   | -0.52 | 7.82E-03 | Dnajb9        | 27362  |
| 1447803_x_at | -0.52 | 4.74E-03 | Capg          | 12332  |
| 1435230_at   | -0.52 | 2.49E-02 | Ankrd12       | 106585 |
| 1424841_s_at | -0.52 | 9.77E-03 | Rbks          | 71336  |
| 1417491_at   | -0.52 | 5.21E-03 | Ctsb          | 13030  |
| 1430125_s_at | -0.52 | 1.10E-02 | Pqlc1         | 66943  |
| 1457782_at   | -0.52 | 1.35E-02 | Tln1          | 21894  |
| 1441823_at   | -0.52 | 3.14E-02 | Zmiz1         | 328365 |
| 1436991_x_at | -0.52 | 6.72E-03 | Gsn           | 227753 |
| 1452164_at   | -0.52 | 5.43E-03 | Fam134a       | 227298 |
| 1419003_at   | -0.52 | 6.71E-03 | Bves          | 23828  |
| 1427945_at   | -0.52 | 1.55E-02 | Dpyd          | 99586  |
| 1454159_a_at | -0.52 | 2.32E-02 | Igfbp2        | 16008  |
| 1452183_a_at | -0.52 | 2.38E-02 | Meg3          | 17263  |
| 1427325_s_at | -0.52 | 6.49E-03 | Akna          | 100182 |
| 1440559_at   | -0.52 | 7.15E-03 | Hmga2-ps1     | 15365  |
| 1417701_at   | -0.52 | 4.93E-03 | Ppp1r14c      | 76142  |

|              |       |          |               |        |
|--------------|-------|----------|---------------|--------|
| 1435584_at   | -0.52 | 6.57E-03 | A630033H20Rik | 213438 |
| 1419516_at   | -0.52 | 4.74E-03 | Fam50a        | 108160 |
| 1422106_a_at | -0.52 | 6.45E-03 | Spsb2         | 14794  |
| 1436889_at   | -0.52 | 8.15E-03 | Gabra1        | 14394  |
| 1418474_at   | -0.53 | 5.05E-03 | Emc9          | 85308  |
| 1415814_at   | -0.53 | 4.14E-03 | Atp6v1b2      | 11966  |
| 1418547_at   | -0.53 | 1.06E-02 | Tfpi2         | 21789  |
| 1418294_at   | -0.53 | 7.06E-03 | Epb4.1l4b     | 54357  |
| 1416130_at   | -0.53 | 5.01E-03 | Prnp          | 19122  |
| 1415812_at   | -0.53 | 5.03E-03 | Gsn           | 227753 |
| 1434315_at   | -0.53 | 5.89E-03 | Nipal3        | 74552  |
| 1424782_at   | -0.53 | 1.11E-02 | Dram2         | 67171  |
| 1460695_a_at | -0.53 | 5.23E-03 | 2010111I01Rik | 72061  |
| 1429622_at   | -0.53 | 5.69E-03 | Cand2         | 67088  |
| 1426151_a_at | -0.53 | 3.60E-02 | Stx3          | 20908  |
| 1416647_at   | -0.53 | 6.11E-03 | Bckdha        | 12039  |
| 1441930_x_at | -0.53 | 1.23E-02 | Vat1          | 26949  |
| 1449014_at   | -0.53 | 5.50E-03 | Lactb         | 80907  |
| 1457836_at   | -0.53 | 1.04E-02 | Mfsd11        | 69900  |
| 1439015_at   | -0.53 | 5.29E-03 | Gfra1         | 14585  |
| 1444642_at   | -0.53 | 6.72E-03 | Uxs1          | 67883  |
| 1452702_at   | -0.53 | 6.38E-03 | Clcn7         | 26373  |
| 1419509_a_at | -0.53 | 4.79E-03 | Nagk          | 56174  |
| 1419932_s_at | -0.53 | 2.54E-02 | Gpr137b       | 83924  |
| 1436609_a_at | -0.53 | 5.07E-03 | Lrpap1        | 16976  |
| 1433841_at   | -0.53 | 6.45E-03 | Ap5z1         | 231855 |
| 1435684_at   | -0.53 | 5.33E-03 | Abcc5         | 27416  |
| 1426144_x_at | -0.53 | 1.17E-02 | Trdn          | 76757  |
| 1448830_at   | -0.53 | 3.69E-03 | Dusp1         | 19252  |
| 1433617_s_at | -0.53 | 5.50E-03 | B4galt5       | 56336  |
| 1437466_at   | -0.53 | 6.15E-03 | Alcam         | 11658  |
| 1428150_at   | -0.53 | 3.13E-02 | Coro7         | 78885  |
| 1460684_at   | -0.53 | 6.89E-03 | Tm7sf2        | 73166  |
| 1417316_at   | -0.53 | 4.14E-03 | Acot13        | 66834  |
| 1427520_a_at | -0.53 | 4.91E-02 | Myh1          | 17879  |
| 1425784_a_at | -0.54 | 5.19E-03 | Olfm1         | 56177  |
| 1450203_at   | -0.54 | 1.36E-02 | Smyd1         | 12180  |
| 1460241_a_at | -0.54 | 5.49E-03 | St3gal5       | 20454  |
| 1452905_at   | -0.54 | 9.98E-03 | Meg3          | 17263  |
| 1434709_at   | -0.54 | 8.93E-03 | Nrcam         | 319504 |
| 1457096_at   | -0.54 | 3.19E-02 | Bhlhe41       | 79362  |
| 1429958_x_at | -0.54 | 9.23E-03 | Haghl         | 68977  |
| 1452595_at   | -0.54 | 4.78E-03 | Adamts4       | 240913 |
| 1433852_at   | -0.54 | 4.82E-03 | Kidins220     | 77480  |
| 1425930_a_at | -0.54 | 7.25E-03 | Mlx           | 21428  |

|              |       |          |               |        |
|--------------|-------|----------|---------------|--------|
| 1428758_at   | -0.54 | 3.89E-03 | Tmem86a       | 67893  |
| 1419486_at   | -0.54 | 9.03E-03 | Foxc1         | 17300  |
| 1436644_x_at | -0.54 | 3.14E-02 | Tmem25        | 71687  |
| 1455316_x_at | -0.54 | 4.79E-03 | BC094435      | 639390 |
| 1435559_at   | -0.54 | 7.49E-03 | Myo6          | 17920  |
| 1416455_a_at | -0.54 | 6.30E-03 | Cryab         | 12955  |
| 1418425_at   | -0.54 | 6.85E-03 | Sp7           | 170574 |
| 1416662_at   | -0.54 | 6.32E-03 | Sardh         | 192166 |
| 1431836_x_at | -0.54 | 6.75E-03 | Mamstr        | 74490  |
| 1424494_s_at | -0.54 | 1.94E-02 | Flywch2       | 76917  |
| 1437556_at   | -0.54 | 6.61E-03 | Zfxh4         | 80892  |
| 1415826_at   | -0.54 | 4.14E-03 | Atp6v1h       | 108664 |
| 1436279_at   | -0.54 | 4.09E-02 | Slc26a7       | 208890 |
| 1448469_at   | -0.54 | 2.12E-02 | Nid1          | 18073  |
| 1450409_a_at | -0.54 | 4.23E-03 | Slc48a1       | 67739  |
| 1421127_at   | -0.54 | 5.53E-03 | Tmem42        | 66079  |
| 1451488_at   | -0.54 | 5.92E-03 | Fitm1         | 68680  |
| 1417639_at   | -0.54 | 2.80E-02 | Slc22a4       | 30805  |
| 1435541_at   | -0.54 | 3.89E-03 | Btc           | 12223  |
| 1426263_at   | -0.54 | 6.59E-03 | Cadm4         | 260299 |
| 1438709_at   | -0.54 | 6.72E-03 | Wipi1         | 52639  |
| 1423653_at   | -0.54 | 4.33E-03 | Atp1a1        | 11928  |
| 1449038_at   | -0.54 | 8.84E-03 | Hsd11b1       | 15483  |
| 1433670_at   | -0.54 | 4.62E-03 | Emp2          | 13731  |
| 1436994_a_at | -0.54 | 1.60E-02 | Hist1h1c      | 50708  |
| 1449712_s_at | -0.54 | 3.89E-03 | Atp6v1e1      | 11973  |
| 1416952_at   | -0.54 | 3.42E-03 | Atp6v1d       | 73834  |
| 1456139_at   | -0.54 | 9.76E-03 | Airn          | 104103 |
| 1447929_at   | -0.54 | 9.82E-03 | Ssh3          | 245857 |
| 1431279_s_at | -0.54 | 1.06E-02 | Ttll5         | 320244 |
| 1418537_at   | -0.55 | 2.86E-02 | Isoc2b        | 67441  |
| 1417552_at   | -0.55 | 3.32E-02 | Fap           | 14089  |
| 1437616_x_at | -0.55 | 4.45E-02 | Zdhhc14       | 224454 |
| 1435389_at   | -0.55 | 4.29E-03 | Reps2         | 194590 |
| 1421818_at   | -0.55 | 6.05E-03 | Bcl6          | 12053  |
| 1423824_at   | -0.55 | 5.41E-03 | Wls           | 68151  |
| 1433488_x_at | -0.55 | 3.46E-03 | Gns           | 75612  |
| 1432686_at   | -0.55 | 9.31E-03 | 4833406M21Rik | 74575  |
| 1416611_at   | -0.55 | 3.42E-03 | Scamp2        | 24044  |
| 1436150_at   | -0.55 | 9.01E-03 | Fam219a       | 71901  |
| 1455947_at   | -0.55 | 1.88E-02 | Mar-11        | 211147 |
| 1419109_at   | -0.55 | 2.15E-02 | Hrc           | 15464  |
| 1449036_at   | -0.55 | 4.47E-03 | Rnf128        | 66889  |
| 1460592_at   | -0.55 | 3.77E-03 | Epb4.1l1      | 13821  |
| 1423489_at   | -0.55 | 3.82E-03 | Mmd           | 67468  |

|              |       |          |               |        |
|--------------|-------|----------|---------------|--------|
| 1422645_at   | -0.55 | 2.37E-02 | Hfe           | 15216  |
| 1427546_at   | -0.55 | 3.39E-02 | Abca8b        | 27404  |
| 1436679_at   | -0.55 | 1.79E-02 | Tecpr1        | 70381  |
| 1451148_at   | -0.55 | 5.80E-03 | Pink1         | 68943  |
| 1434409_at   | -0.55 | 6.59E-03 | Armcx6        | 278097 |
| 1433546_at   | -0.55 | 3.75E-03 | Gns           | 75612  |
| 1451969_s_at | -0.55 | 3.45E-03 | Parp3         | 235587 |
| 1416671_a_at | -0.55 | 5.47E-03 | Mcoln1        | 94178  |
| 1450389_s_at | -0.55 | 4.01E-03 | Pip5k1b       | 18719  |
| 1435472_at   | -0.55 | 6.45E-03 | Kremen1       | 84035  |
| 1455737_at   | -0.55 | 2.66E-02 | Ppm1h         | 319468 |
| 1426478_at   | -0.55 | 5.03E-03 | Rasa1         | 218397 |
| 1422508_at   | -0.55 | 3.44E-03 | Atp6v1a       | 11964  |
| 1455037_at   | -0.55 | 4.87E-03 | Plxna2        | 18845  |
| 1452890_at   | -0.55 | 5.83E-03 | Ttl5          | 320244 |
| 1426777_a_at | -0.56 | 2.92E-02 | Wasl          | 73178  |
| 1440825_s_at | -0.56 | 5.92E-03 | Ccdc28a       | 215814 |
| 1456255_at   | -0.56 | 4.38E-02 | Al314180      | 230249 |
| 1433968_a_at | -0.56 | 6.54E-03 | Megf9         | 230316 |
| 1448568_a_at | -0.56 | 3.57E-03 | Slc20a1       | 20515  |
| 1428786_at   | -0.56 | 8.34E-03 | Nckap1l       | 105855 |
| 1449420_at   | -0.56 | 3.18E-02 | Pde1b         | 18574  |
| 1437558_at   | -0.56 | 7.76E-03 | B130021B11Rik | 320860 |
| 1436849_x_at | -0.56 | 4.14E-03 | Gaa           | 14387  |
| 1452202_at   | -0.56 | 4.32E-03 | Pde2a         | 207728 |
| 1428204_at   | -0.56 | 2.10E-02 | Gabrb2        | 14401  |
| 1434214_at   | -0.56 | 5.53E-03 | Lamtor4       | 66096  |
| 1456665_at   | -0.56 | 4.65E-03 | Eya4          | 14051  |
| 1440940_at   | -0.56 | 8.09E-03 | Cacnb1        | 12295  |
| 1437149_at   | -0.56 | 3.00E-03 | Slc6a6        | 21366  |
| 1434263_at   | -0.56 | 4.04E-03 | Mfsd12        | 73822  |
| 1416034_at   | -0.56 | 4.02E-03 | Cd24a         | 12484  |
| 1436907_at   | -0.56 | 7.09E-03 | Nav1          | 215690 |
| 1428443_a_at | -0.56 | 6.19E-03 | Rap1gap       | 110351 |
| 1433909_at   | -0.56 | 2.72E-03 | Syt17         | 110058 |
| 1444494_at   | -0.56 | 3.75E-03 | Klhl41        | 228003 |
| 1437958_at   | -0.56 | 2.93E-02 | Xpr1          | 19775  |
| 1428406_s_at | -0.56 | 3.58E-03 | Hcfc1r1       | 353502 |
| 1429896_at   | -0.57 | 8.38E-03 | 5830408B19Rik | 74756  |
| 1452309_at   | -0.57 | 9.66E-03 | Cgnl1         | 68178  |
| 1435085_at   | -0.57 | 7.95E-03 | Crebl2        | 232430 |
| 1455683_a_at | -0.57 | 8.00E-03 | Tbc1d8        | 54610  |
| 1416937_at   | -0.57 | 3.17E-03 | Gabarap       | 56486  |
| 1448328_at   | -0.57 | 4.16E-03 | Sh3bp2        | 24055  |
| 1426037_a_at | -0.57 | 6.56E-03 | Rgs16         | 19734  |

|              |       |          |               |        |
|--------------|-------|----------|---------------|--------|
| 1429830_a_at | -0.57 | 4.77E-03 | Cd59a         | 12509  |
| 1450627_at   | -0.57 | 2.72E-03 | Ank           | 11732  |
| 1417669_at   | -0.57 | 2.73E-03 | Abhd12        | 76192  |
| 1439395_at   | -0.57 | 1.78E-02 | Zfp874b       | 408067 |
| 1421477_at   | -0.57 | 6.15E-03 | Cplx2         | 12890  |
| 1455762_at   | -0.57 | 9.90E-03 | Kidins220     | 77480  |
| 1433485_x_at | -0.57 | 4.11E-03 | Gpr56         | 14766  |
| 1449129_a_at | -0.57 | 1.39E-02 | Kcnip3        | 56461  |
| 1416424_at   | -0.57 | 3.32E-03 | Plin3         | 66905  |
| 1456150_at   | -0.57 | 3.42E-03 | Kdm7a         | 338523 |
| 1418677_at   | -0.57 | 4.74E-03 | Actn3         | 11474  |
| 1416274_at   | -0.57 | 5.74E-03 | Ctns          | 83429  |
| 1424958_at   | -0.57 | 5.47E-03 | Car8          | 12319  |
| 1429813_at   | -0.57 | 1.10E-02 | Pank1         | 75735  |
| 1420575_at   | -0.58 | 5.03E-03 | Mt3           | 17751  |
| 1417757_at   | -0.58 | 2.85E-02 | Unc13b        | 22249  |
| 1456446_at   | -0.58 | 2.19E-02 | 4930523C07Rik | 67647  |
| 1434361_at   | -0.58 | 1.32E-02 | Snx33         | 235406 |
| 1416901_at   | -0.58 | 3.09E-03 | Npc2          | 67963  |
| 1416672_s_at | -0.58 | 3.01E-03 | Mcoln1        | 94178  |
| 1443960_at   | -0.58 | 1.77E-02 | Asrgl1        | 66514  |
| 1418075_at   | -0.58 | 3.96E-03 | St6galnac4    | 20448  |
| 1420502_at   | -0.58 | 3.05E-03 | Sat1          | 20229  |
| 1445703_at   | -0.58 | 9.61E-03 | Ptchd1        | 211612 |
| 1452015_at   | -0.58 | 4.69E-03 | 6330416G13Rik | 230279 |
| 1460550_at   | -0.58 | 8.75E-03 | Mtmr11        | 194126 |
| 1422231_a_at | -0.58 | 1.41E-02 | Tnfrsf25      | 85030  |
| 1417697_at   | -0.58 | 3.39E-03 | Soat1         | 20652  |
| 1425632_a_at | -0.58 | 2.77E-03 | Pqlc2         | 212555 |
| 1450241_a_at | -0.58 | 2.49E-03 | Evi2a         | 14017  |
| 1424690_at   | -0.58 | 3.65E-02 | Cacfd1        | 381356 |
| 1432997_at   | -0.58 | 2.32E-03 | 5830462P14Rik | 76098  |
| 1418314_a_at | -0.58 | 4.00E-03 | Rbfox1        | 268859 |
| 1440455_at   | -0.58 | 2.81E-03 | Camk2n1       | 66259  |
| 1418752_at   | -0.58 | 1.61E-02 | Aldh3a1       | 11670  |
| 1433722_at   | -0.58 | 2.87E-03 | Akap13        | 75547  |
| 1460180_at   | -0.58 | 2.72E-03 | Hexb          | 15212  |
| 1451634_at   | -0.58 | 8.00E-03 | Airn          | 104103 |
| 1449668_s_at | -0.58 | 3.17E-03 | Fnip1         | 216742 |
| 1418049_at   | -0.58 | 3.44E-03 | Ltbp3         | 16998  |
| 1426758_s_at | -0.58 | 2.86E-03 | Meg3          | 17263  |
| 1440990_at   | -0.58 | 1.04E-02 | Kif26b        | 269152 |
| 1433477_at   | -0.58 | 3.26E-03 | Abr           | 109934 |
| 1425627_x_at | -0.58 | 3.50E-03 | Gstm1         | 14862  |
| 1451411_at   | -0.58 | 2.56E-03 | Gprc5b        | 64297  |

|              |       |          |               |        |
|--------------|-------|----------|---------------|--------|
| 1415856_at   | -0.59 | 2.39E-03 | Emb           | 13723  |
| 1419979_s_at | -0.59 | 4.14E-03 | Creb3         | 12913  |
| 1416666_at   | -0.59 | 4.65E-03 | Serpine2      | 20720  |
| 1419844_a_at | -0.59 | 3.58E-03 | LOC545086     | 545086 |
| 1446861_at   | -0.59 | 7.21E-03 | Gns           | 75612  |
| 1445597_s_at | -0.59 | 3.07E-03 | Pla2g16       | 225845 |
| 1449360_at   | -0.59 | 6.22E-03 | Csf2rb2       | 12984  |
| 1421346_a_at | -0.59 | 2.66E-03 | Slc6a6        | 21366  |
| 1436193_at   | -0.59 | 3.87E-03 | Man1c1        | 230815 |
| 1419485_at   | -0.59 | 3.89E-03 | Foxc1         | 17300  |
| 1425383_a_at | -0.59 | 3.09E-03 | Pbx1          | 18514  |
| 1448343_a_at | -0.59 | 3.24E-03 | Nbr1          | 17966  |
| 1459218_at   | -0.59 | 9.14E-03 | Mroh1         | 223658 |
| 1416165_at   | -0.59 | 2.57E-03 | Rab31         | 106572 |
| 1426300_at   | -0.59 | 2.63E-03 | Alcam         | 11658  |
| 1451883_at   | -0.59 | 3.09E-03 | BC002189      | 620316 |
| 1417251_at   | -0.59 | 3.49E-03 | Palmd         | 114301 |
| 1457010_at   | -0.59 | 7.97E-03 | 3010001F23Rik | 75693  |
| 1417632_at   | -0.59 | 5.17E-03 | Atp6v0a1      | 11975  |
| 1418025_at   | -0.59 | 5.21E-03 | Bhlhe40       | 20893  |
| 1420127_s_at | -0.59 | 7.40E-03 | Ccp1          | 72278  |
| 1459585_at   | -0.59 | 2.72E-02 | Gas6          | 14456  |
| 1426095_a_at | -0.59 | 5.36E-03 | Tnfrsf22      | 79202  |
| 1429212_a_at | -0.59 | 3.37E-03 | Lrrc51        | 69358  |
| 1420183_at   | -0.59 | 4.49E-03 | Lor           | 16939  |
| 1438167_x_at | -0.59 | 6.55E-03 | Flcn          | 216805 |
| 1427878_at   | -0.60 | 2.52E-03 | Cystm1        | 66060  |
| 1447842_x_at | -0.60 | 2.66E-03 | Tcn2          | 21452  |
| 1449553_at   | -0.60 | 2.42E-03 | Nkain1        | 67149  |
| 1418155_at   | -0.60 | 1.49E-02 | Myot          | 58916  |
| 1447927_at   | -0.60 | 6.30E-03 | Gbp6          | 100702 |
| 1418976_s_at | -0.60 | 6.22E-03 | Cideb         | 12684  |
| 1429163_at   | -0.60 | 3.29E-03 | Dchs1         | 233651 |
| 1421469_a_at | -0.60 | 7.17E-03 | Stat5a        | 20850  |
| 1429934_at   | -0.60 | 3.67E-03 | 4930502E18Rik | 75013  |
| 1426301_at   | -0.60 | 4.13E-03 | Alcam         | 11658  |
| 1417301_at   | -0.60 | 3.75E-03 | Fzd6          | 14368  |
| 1427177_at   | -0.60 | 2.06E-03 | Fyco1         | 17281  |
| 1438989_s_at | -0.60 | 6.38E-03 | B130021B11Rik | 320860 |
| 1429267_at   | -0.60 | 3.73E-03 | Acot11        | 329910 |
| 1420501_at   | -0.60 | 2.64E-03 | Dnajc1        | 13418  |
| 1448510_at   | -0.60 | 8.09E-03 | Efna1         | 13636  |
| 1435749_at   | -0.60 | 2.00E-02 | Gda           | 14544  |
| 1428332_at   | -0.60 | 1.16E-02 | Pik3ip1       | 216505 |
| 1424894_at   | -0.60 | 3.24E-03 | Rab13         | 68328  |

|              |       |          |           |        |
|--------------|-------|----------|-----------|--------|
| 1448154_at   | -0.60 | 1.84E-03 | Ndrp2     | 29811  |
| 1460287_at   | -0.60 | 2.32E-03 | Timp2     | 21858  |
| 1437252_at   | -0.60 | 3.12E-03 | Gatsl2    | 80909  |
| 1454283_at   | -0.60 | 6.71E-03 | Slc38a9   | 268706 |
| 1444992_at   | -0.60 | 2.93E-03 | Al120166  | 103141 |
| 1423993_at   | -0.60 | 2.03E-03 | Atp6v1f   | 66144  |
| 1419040_at   | -0.60 | 1.15E-02 | Cyp2d22   | 56448  |
| 1456567_x_at | -0.60 | 1.77E-03 | Grn       | 14824  |
| 1444396_at   | -0.60 | 3.34E-02 | Trp53inp2 | 68728  |
| 1460122_at   | -0.61 | 3.00E-03 | Tmem41b   | 233724 |
| 1451446_at   | -0.61 | 2.22E-03 | Antxr1    | 69538  |
| 1424359_at   | -0.61 | 2.11E-03 | Oplah     | 75475  |
| 1434405_at   | -0.61 | 3.06E-03 | Fnip1     | 216742 |
| 1450708_at   | -0.61 | 6.75E-03 | Scg2      | 20254  |
| 1453275_at   | -0.61 | 3.44E-03 | Dynap     | 75577  |
| 1453596_at   | -0.61 | 5.29E-03 | Id2       | 15902  |
| 1437092_at   | -0.61 | 3.00E-03 | Clip4     | 78785  |
| 1435229_at   | -0.61 | 7.23E-03 | Gramd1b   | 235283 |
| 1432331_a_at | -0.61 | 2.87E-03 | Prrx2     | 20204  |
| 1436277_at   | -0.61 | 5.43E-03 | Rnf207    | 433809 |
| 1431382_a_at | -0.61 | 4.67E-03 | Clip4     | 78785  |
| 1420389_at   | -0.61 | 3.87E-03 | Pax3      | 18505  |
| 1428614_at   | -0.61 | 5.94E-03 | Ldhd      | 52815  |
| 1427445_a_at | -0.61 | 1.40E-02 | Ttn       | 22138  |
| 1421812_at   | -0.61 | 3.95E-03 | Tapbp     | 21356  |
| 1426143_at   | -0.61 | 8.38E-03 | Trdn      | 76757  |
| 1439380_x_at | -0.61 | 9.03E-03 | Meg3      | 17263  |
| 1442869_at   | -0.61 | 3.73E-03 | Dok7      | 231134 |
| 1422330_at   | -0.61 | 1.37E-02 | Glp1r     | 14652  |
| 1424893_at   | -0.61 | 2.78E-03 | Ndel1     | 83431  |
| 1437688_x_at | -0.61 | 1.89E-03 | Atp6ap2   | 70495  |
| 1434653_at   | -0.61 | 2.02E-03 | Ptk2b     | 19229  |
| 1416978_at   | -0.61 | 3.64E-03 | Fcgrt     | 14132  |
| 1428651_at   | -0.61 | 5.29E-03 | Klhl24    | 75785  |
| 1419821_s_at | -0.61 | 4.66E-03 | Idh1      | 15926  |
| 1438629_x_at | -0.61 | 1.96E-03 | Grn       | 14824  |
| 1421374_a_at | -0.61 | 1.05E-02 | Fxyd1     | 56188  |
| 1456487_at   | -0.61 | 4.35E-03 | Adcy1     | 432530 |
| 1456586_x_at | -0.61 | 3.46E-03 | Mvp       | 78388  |
| 1437406_x_at | -0.61 | 1.02E-02 | Igfbp4    | 16010  |
| 1455300_at   | -0.61 | 9.10E-03 | Tet2      | 214133 |
| 1437889_x_at | -0.61 | 3.88E-03 | Bgn       | 12111  |
| 1424588_at   | -0.61 | 1.82E-03 | Srgap3    | 259302 |
| 1417399_at   | -0.62 | 3.60E-03 | Gas6      | 14456  |
| 1424902_at   | -0.62 | 3.29E-03 | Plxdc1    | 72324  |



|              |       |          |               |        |
|--------------|-------|----------|---------------|--------|
| 1434639_at   | -0.62 | 1.43E-02 | Klhl29        | 208439 |
| 1418949_at   | -0.62 | 2.80E-03 | Gdf15         | 23886  |
| 1421834_at   | -0.62 | 2.85E-03 | Pip5k1b       | 18719  |
| 1437064_at   | -0.62 | 2.36E-03 | Ar            | 11835  |
| 1456214_at   | -0.62 | 8.79E-03 | Pcdh7         | 54216  |
| 1420123_at   | -0.62 | 2.22E-03 | Tcta          | 102791 |
| 1425814_a_at | -0.62 | 4.66E-03 | Calcr1        | 54598  |
| 1445537_at   | -0.62 | 8.95E-03 | 2310039F13Rik | 76754  |
| 1416066_at   | -0.62 | 1.63E-03 | Cd9           | 12527  |
| 1426316_at   | -0.62 | 2.48E-03 | 6330416G13Rik | 230279 |
| 1432787_at   | -0.62 | 3.07E-03 | 6720420G18Rik | 77072  |
| 1437434_a_at | -0.62 | 1.53E-03 | Wls           | 68151  |
| 1456069_at   | -0.62 | 8.88E-03 | Dtna          | 13527  |
| 1420617_at   | -0.62 | 3.95E-03 | Cpeb4         | 67579  |
| 1449408_at   | -0.62 | 1.91E-03 | Jam2          | 67374  |
| 1418396_at   | -0.62 | 2.81E-03 | Gpsm3         | 106512 |
| 1419428_a_at | -0.62 | 2.62E-03 | Gaa           | 14387  |
| 1448330_at   | -0.62 | 2.42E-03 | Gstm1         | 14862  |
| 1425663_at   | -0.62 | 1.22E-02 | Il1rn         | 16181  |
| 1452347_at   | -0.62 | 1.77E-03 | Mef2a         | 17258  |
| 1427185_at   | -0.62 | 1.65E-03 | Mef2a         | 17258  |
| 1451299_at   | -0.62 | 1.88E-03 | Prkx          | 19108  |
| 1434741_at   | -0.62 | 2.32E-03 | Rreb1         | 68750  |
| 1434642_at   | -0.62 | 1.70E-03 | Hsd17b11      | 114664 |
| 1435744_at   | -0.62 | 3.37E-03 | Firre         | 103012 |
| 1449106_at   | -0.62 | 2.22E-03 | Gpx3          | 14778  |
| 1453278_a_at | -0.63 | 2.09E-03 | Clip4         | 78785  |
| 1416935_at   | -0.63 | 4.60E-03 | Trpv2         | 22368  |
| 1419811_at   | -0.63 | 7.86E-03 | Adcy9         | 11515  |
| 1419292_at   | -0.63 | 3.99E-03 | Htra3         | 78558  |
| 1438928_x_at | -0.63 | 1.92E-03 | Ninj1         | 18081  |
| 1430036_at   | -0.63 | 2.99E-03 | 2310015B20Rik | 69563  |
| 1423141_at   | -0.63 | 2.43E-03 | Lipa          | 16889  |
| 1417597_at   | -0.63 | 1.05E-02 | Cd28          | 12487  |
| 1434277_a_at | -0.63 | 1.86E-03 | Ypel2         | 77864  |
| 1447658_x_at | -0.63 | 6.85E-03 | Synpo2l       | 68760  |
| 1428114_at   | -0.63 | 6.88E-03 | Slc14a1       | 108052 |
| 1426368_at   | -0.63 | 3.68E-03 | Rin2          | 74030  |
| 1460367_at   | -0.63 | 1.88E-03 | Hbp1          | 73389  |
| 1435852_at   | -0.63 | 3.89E-03 | Spred3        | 101809 |
| 1426362_at   | -0.63 | 1.43E-03 | Tmem144       | 70652  |
| 1451132_at   | -0.63 | 2.22E-03 | Pbxip1        | 229534 |
| 1417706_at   | -0.63 | 2.48E-03 | Naglu         | 27419  |
| 1460591_at   | -0.63 | 2.22E-03 | Esr1          | 13982  |
| 1445178_at   | -0.63 | 8.34E-03 | Sh3rf1        | 59009  |

|              |       |          |               |        |
|--------------|-------|----------|---------------|--------|
| 1435355_at   | -0.63 | 3.09E-03 | Neb           | 17996  |
| 1428420_a_at | -0.63 | 1.43E-03 | Exoc3l4       | 74190  |
| 1416013_at   | -0.64 | 2.22E-03 | Pld3          | 18807  |
| 1456681_at   | -0.64 | 8.93E-03 | Ptchd1        | 211612 |
| 1421425_a_at | -0.64 | 2.09E-03 | Rcan2         | 53901  |
| 1453542_at   | -0.64 | 1.36E-02 | 2610007B07Rik | 72439  |
| 1416408_at   | -0.64 | 1.60E-03 | Acox1         | 11430  |
| 1426562_a_at | -0.64 | 3.61E-03 | Olfm1         | 56177  |
| 1455992_at   | -0.64 | 1.47E-03 | Vgll4         | 232334 |
| 1426624_a_at | -0.64 | 1.97E-03 | Ypel3         | 66090  |
| 1453731_a_at | -0.64 | 1.98E-03 | Dram2         | 67171  |
| 1436568_at   | -0.64 | 5.29E-03 | Jam2          | 67374  |
| 1437710_x_at | -0.64 | 1.64E-03 | Fam71e1       | 75538  |
| 1423488_at   | -0.64 | 1.36E-03 | Mmd           | 67468  |
| 1449925_at   | -0.64 | 1.62E-03 | Cxcr3         | 12766  |
| 1433643_at   | -0.64 | 2.52E-03 | Cacna2d1      | 12293  |
| 1453286_at   | -0.64 | 2.54E-03 | Plxna2        | 18845  |
| 1418485_at   | -0.64 | 1.89E-03 | Slc4a3        | 20536  |
| 1453913_a_at | -0.64 | 7.45E-03 | Tap2          | 21355  |
| 1451867_x_at | -0.64 | 4.26E-03 | Arhgap6       | 11856  |
| 1423854_a_at | -0.64 | 4.14E-03 | Rasl11b       | 68939  |
| 1436301_at   | -0.65 | 1.82E-03 | Dstyk         | 213452 |
| 1438800_at   | -0.65 | 6.59E-03 | Nagk          | 56174  |
| 1436627_at   | -0.65 | 4.00E-03 | Airn          | 104103 |
| 1435169_at   | -0.65 | 1.50E-02 | Crebrf        | 77128  |
| 1460344_at   | -0.65 | 1.61E-03 | Pbxip1        | 229534 |
| 1439793_at   | -0.65 | 5.50E-03 | Gja3          | 14611  |
| 1422751_at   | -0.65 | 2.86E-03 | Tle1          | 21885  |
| 1424786_s_at | -0.65 | 1.65E-03 | Wdr45         | 54636  |
| 1456333_a_at | -0.65 | 9.82E-03 | Arhgap6       | 11856  |
| 1458148_at   | -0.65 | 1.49E-03 | Nlrc3         | 268857 |
| 1418318_at   | -0.65 | 1.55E-03 | Rnf128        | 66889  |
| 1417040_a_at | -0.65 | 1.20E-03 | Bok           | 51800  |
| 1448618_at   | -0.65 | 2.22E-03 | Mvp           | 78388  |
| 1423260_at   | -0.65 | 3.99E-03 | Id4           | 15904  |
| 1436395_at   | -0.65 | 2.86E-03 | Card6         | 239319 |
| 1421977_at   | -0.65 | 9.28E-03 | Mmp19         | 58223  |
| 1417143_at   | -0.65 | 2.01E-03 | Lpar1         | 14745  |
| 1435089_at   | -0.65 | 1.73E-03 | 2010111I01Rik | 72061  |
| 1454204_at   | -0.65 | 1.67E-03 | 4930442G10Rik | 73986  |
| 1424659_at   | -0.66 | 1.98E-03 | Slit2         | 20563  |
| 1452968_at   | -0.66 | 1.58E-03 | Cthrc1        | 68588  |
| 1427306_at   | -0.66 | 2.24E-03 | Ryr1          | 20190  |
| 1420450_at   | -0.66 | 1.47E-02 | Mmp10         | 17384  |
| 1439327_at   | -0.66 | 1.15E-02 | Ccbe1         | 320924 |

|              |       |          |               |        |
|--------------|-------|----------|---------------|--------|
| 1421228_at   | -0.66 | 1.50E-03 | Ccl7          | 20306  |
| 1456260_at   | -0.66 | 8.99E-03 | Rbbp4         | 19646  |
| 1460365_a_at | -0.66 | 1.18E-03 | Dnm1          | 13429  |
| 1459839_x_at | -0.66 | 1.55E-03 | Btbd11        | 74007  |
| 1428657_at   | -0.66 | 2.82E-03 | Rreb1         | 68750  |
| 1447707_s_at | -0.66 | 2.12E-03 | Pde2a         | 207728 |
| 1417001_a_at | -0.66 | 1.48E-03 | Rsrp1         | 27981  |
| 1422243_at   | -0.66 | 1.64E-02 | Fgf7          | 14178  |
| 1455347_at   | -0.66 | 4.00E-03 | Rtel1         | 269400 |
| 1437833_at   | -0.66 | 3.30E-03 | Ltbp3         | 16998  |
| 1420355_at   | -0.66 | 8.05E-03 | Grk4          | 14772  |
| 1440888_at   | -0.66 | 5.43E-03 | Oxtr          | 18430  |
| 1435945_a_at | -0.66 | 1.58E-03 | Kcnn4         | 16534  |
| 1428405_at   | -0.66 | 1.39E-03 | Hcfc1r1       | 353502 |
| 1416387_at   | -0.66 | 1.39E-03 | Pip4k2c       | 117150 |
| 1419589_at   | -0.66 | 2.79E-03 | Cd93          | 17064  |
| 1423341_at   | -0.66 | 7.49E-03 | Cspg4         | 121021 |
| 1419814_s_at | -0.67 | 1.64E-03 | S100a1        | 20193  |
| 1431416_a_at | -0.67 | 1.36E-03 | Jam2          | 67374  |
| 1436507_at   | -0.67 | 1.92E-03 | Irak2         | 108960 |
| 1418643_at   | -0.67 | 5.52E-03 | Tspan13       | 66109  |
| 1442157_at   | -0.67 | 1.39E-03 | A930041H05Rik | 77834  |
| 1428289_at   | -0.67 | 1.13E-03 | Klf9          | 16601  |
| 1428132_at   | -0.67 | 1.55E-03 | Cdc42se1      | 57912  |
| 1424726_at   | -0.67 | 1.11E-03 | Tmem150a      | 232086 |
| 1417995_at   | -0.67 | 8.93E-03 | Ptpn22        | 19260  |
| 1420918_at   | -0.67 | 3.18E-03 | Sgk3          | 170755 |
| 1419372_at   | -0.67 | 1.02E-03 | Gosr2         | 56494  |
| 1452527_a_at | -0.67 | 1.45E-03 | P2rx4         | 18438  |
| 1450355_a_at | -0.67 | 1.08E-03 | Capg          | 12332  |
| 1429060_at   | -0.67 | 1.26E-03 | Malat1        | 72289  |
| 1436138_at   | -0.67 | 1.99E-03 | Ttc19         | 72795  |
| 1423437_at   | -0.67 | 1.98E-03 | Gsta3         | 14859  |
| 1422544_at   | -0.67 | 1.09E-03 | Myo10         | 17909  |
| 1422336_at   | -0.67 | 8.78E-03 | Hoxa13        | 15398  |
| 1425333_at   | -0.67 | 1.09E-03 | Rab43         | 69834  |
| 1416804_at   | -0.67 | 2.72E-03 | Ehbp111       | 114601 |
| 1444021_at   | -0.67 | 3.09E-03 | Sqstm1        | 18412  |
| 1459838_s_at | -0.67 | 1.09E-03 | Btbd11        | 74007  |
| 1419371_s_at | -0.67 | 1.06E-03 | Gosr2         | 56494  |
| 1424150_at   | -0.67 | 5.18E-03 | Gdpd5         | 233552 |
| 1423414_at   | -0.67 | 1.05E-03 | Ptgs1         | 19224  |
| 1434188_at   | -0.68 | 1.62E-03 | Slc16a12      | 240638 |
| 1434768_at   | -0.68 | 1.79E-03 | Tpp1          | 12751  |
| 1419435_at   | -0.68 | 1.20E-03 | Aox1          | 11761  |

|              |       |          |               |        |
|--------------|-------|----------|---------------|--------|
| 1422635_at   | -0.68 | 3.68E-03 | Ache          | 11423  |
| 1439766_x_at | -0.68 | 1.90E-03 | Vegfc         | 22341  |
| 1452583_s_at | -0.68 | 3.84E-03 | Galm          | 319625 |
| 1416416_x_at | -0.68 | 1.58E-03 | Gstm1         | 14862  |
| 1448313_at   | -0.68 | 9.38E-04 | Tpp1          | 12751  |
| 1448124_at   | -0.68 | 9.79E-04 | Gusb          | 110006 |
| 1422433_s_at | -0.68 | 1.11E-03 | Idh1          | 15926  |
| 1421299_a_at | -0.68 | 1.65E-02 | Lef1          | 16842  |
| 1419693_at   | -0.68 | 1.95E-02 | Colec12       | 140792 |
| 1423825_at   | -0.69 | 1.14E-03 | Wls           | 68151  |
| 1452650_at   | -0.69 | 3.44E-03 | Trim62        | 67525  |
| 1415996_at   | -0.69 | 1.24E-03 | Txnip         | 56338  |
| 1434909_at   | -0.69 | 1.10E-03 | Rragd         | 52187  |
| 1431188_a_at | -0.69 | 1.26E-03 | Tom1          | 21968  |
| 1435867_at   | -0.69 | 1.52E-03 | Kdm7a         | 338523 |
| 1426315_a_at | -0.69 | 8.96E-04 | 6330416G13Rik | 230279 |
| 1417421_at   | -0.69 | 1.52E-03 | S100a1        | 20193  |
| 1455214_at   | -0.69 | 2.97E-03 | Mitf          | 17342  |
| 1423777_at   | -0.69 | 1.42E-03 | Usp20         | 74270  |
| 1429173_at   | -0.69 | 1.15E-03 | Dnase111      | 69537  |
| 1418489_a_at | -0.69 | 3.04E-03 | Calcr1        | 54598  |
| 1445233_at   | -0.69 | 3.40E-03 | Rhbdl2        | 230726 |
| 1417814_at   | -0.69 | 1.84E-02 | Pla2g5        | 18784  |
| 1435332_at   | -0.69 | 7.14E-03 | Htr7          | 15566  |
| 1426584_a_at | -0.70 | 1.25E-03 | Sord          | 20322  |
| 1417490_at   | -0.70 | 9.22E-04 | Ctsb          | 13030  |
| 1439127_at   | -0.70 | 2.37E-03 | Al314180      | 230249 |
| 1425536_at   | -0.70 | 8.67E-04 | Stx3          | 20908  |
| 1460239_at   | -0.70 | 1.02E-03 | Tspan13       | 66109  |
| 1434154_at   | -0.70 | 1.17E-03 | Kctd13        | 233877 |
| 1415949_at   | -0.70 | 1.01E-03 | Cpe           | 12876  |
| 1422776_at   | -0.70 | 1.38E-03 | Serpinb8      | 20725  |
| 1434413_at   | -0.70 | 3.26E-03 | Igf1          | 16000  |
| 1428357_at   | -0.70 | 6.38E-03 | Tdrp          | 72148  |
| 1422706_at   | -0.70 | 2.41E-03 | Pmepa1        | 65112  |
| 1422571_at   | -0.70 | 1.89E-03 | Thbs2         | 21826  |
| 1448327_at   | -0.70 | 1.15E-03 | Actn2         | 11472  |
| 1439456_x_at | -0.70 | 1.10E-03 | Atp6ap2       | 70495  |
| 1458308_at   | -0.70 | 8.22E-03 | Sbno2         | 216161 |
| 1449510_at   | -0.70 | 6.88E-03 | Zfp467        | 68910  |
| 1448732_at   | -0.70 | 8.26E-04 | Ctsb          | 13030  |
| 1415671_at   | -0.70 | 8.18E-04 | Atp6v0d1      | 11972  |
| 1423726_at   | -0.70 | 1.06E-03 | Vat1          | 26949  |
| 1417066_at   | -0.71 | 3.75E-03 | Adck3         | 67426  |
| 1426159_x_at | -0.71 | 1.06E-03 | Tcrb-J        | 21580  |

|              |       |          |               |        |
|--------------|-------|----------|---------------|--------|
| 1450099_a_at | -0.71 | 8.99E-04 | Gba           | 14466  |
| 1419220_at   | -0.71 | 2.42E-03 | Xirp1         | 22437  |
| 1452478_at   | -0.71 | 1.40E-03 | Alpk2         | 225638 |
| 1423450_a_at | -0.71 | 2.81E-03 | Hs3st1        | 15476  |
| 1426063_a_at | -0.71 | 1.37E-02 | Gem           | 14579  |
| 1452533_at   | -0.71 | 7.00E-03 | Ryr3          | 20192  |
| 1443867_at   | -0.71 | 1.64E-03 | Ankrd12       | 106585 |
| 1437025_at   | -0.71 | 4.32E-03 | Cd28          | 12487  |
| 1453898_at   | -0.71 | 6.53E-03 | Nmrk2         | 69564  |
| 1428574_a_at | -0.71 | 9.43E-03 | Chn2          | 69993  |
| 1433783_at   | -0.71 | 8.05E-03 | Ldb3          | 24131  |
| 1415941_s_at | -0.71 | 1.40E-03 | Zfand2a       | 100494 |
| 1455239_at   | -0.71 | 1.63E-03 | Ifitm10       | 320802 |
| 1450757_at   | -0.71 | 9.58E-04 | Cdh11         | 12552  |
| 1417333_at   | -0.71 | 1.10E-03 | Rasa4         | 54153  |
| 1454901_at   | -0.71 | 4.09E-03 | Ypel2         | 77864  |
| 1451507_at   | -0.71 | 1.10E-03 | Mef2c         | 17260  |
| 1417696_at   | -0.71 | 8.78E-04 | Soat1         | 20652  |
| 1428650_at   | -0.71 | 1.27E-03 | Tns1          | 21961  |
| 1422771_at   | -0.71 | 1.20E-03 | Smad6         | 17130  |
| 1426595_at   | -0.71 | 2.01E-03 | Slc18a1       | 110877 |
| 1455162_at   | -0.71 | 5.32E-03 | Ttc39a        | 230603 |
| 1424030_at   | -0.71 | 9.23E-03 | Grhl1         | 195733 |
| 1448148_at   | -0.72 | 7.75E-04 | Grn           | 14824  |
| 1457293_at   | -0.72 | 1.18E-03 | Zbtb4         | 75580  |
| 1439437_x_at | -0.72 | 1.05E-02 | Cpe           | 12876  |
| 1448467_a_at | -0.72 | 9.86E-04 | Ehbp111       | 114601 |
| 1423865_at   | -0.72 | 8.39E-04 | Slc44a1       | 100434 |
| 1451584_at   | -0.72 | 5.90E-03 | Havcr2        | 171285 |
| 1448152_at   | -0.72 | 1.13E-03 | Igf2          | 16002  |
| 1423663_at   | -0.72 | 7.73E-04 | Ficn          | 216805 |
| 1452520_a_at | -0.72 | 1.61E-03 | Chrng         | 11449  |
| 1449178_at   | -0.72 | 1.37E-03 | Pdlim3        | 53318  |
| 1429772_at   | -0.72 | 2.97E-03 | Plxna2        | 18845  |
| 1427357_at   | -0.72 | 1.61E-03 | Cda           | 72269  |
| 1447928_at   | -0.73 | 1.03E-02 | Car5b         | 56078  |
| 1433742_at   | -0.73 | 2.54E-03 | Kank1         | 107351 |
| 1430183_at   | -0.73 | 7.66E-04 | 4833414E09Rik | 71633  |
| 1415857_at   | -0.73 | 6.87E-04 | Emb           | 13723  |
| 1419564_at   | -0.73 | 1.36E-02 | Zfp467        | 68910  |
| 1443827_x_at | -0.73 | 1.26E-03 | Fam20c        | 80752  |
| 1455872_at   | -0.73 | 3.75E-03 | Fam167a       | 219148 |
| 1435679_at   | -0.73 | 8.96E-04 | Optn          | 71648  |
| 1454731_at   | -0.73 | 8.97E-04 | Myo10         | 17909  |
| 1425525_a_at | -0.73 | 7.28E-04 | P2rx4         | 18438  |

|              |       |          |               |        |
|--------------|-------|----------|---------------|--------|
| 1448118_a_at | -0.73 | 8.60E-04 | Ctsd          | 13033  |
| 1439087_a_at | -0.73 | 1.53E-03 | Pik3ip1       | 216505 |
| 1424111_at   | -0.73 | 7.75E-04 | Igf2r         | 16004  |
| 1420498_a_at | -0.73 | 7.68E-04 | Dab2          | 13132  |
| 1454967_at   | -0.73 | 2.52E-03 | Crebrf        | 77128  |
| 1426772_x_at | -0.73 | 1.53E-03 | Tcrb-J        | 21580  |
| 1425530_a_at | -0.73 | 3.01E-03 | Stx3          | 20908  |
| 1442659_at   | -0.74 | 1.79E-03 | Pcdh9         | 211712 |
| 1428203_at   | -0.74 | 7.18E-03 | Gabrb2        | 14401  |
| 1451731_at   | -0.74 | 7.16E-04 | Abca3         | 27410  |
| 1427146_at   | -0.74 | 1.90E-03 | Carns1        | 107239 |
| 1429841_at   | -0.74 | 9.22E-04 | Megf10        | 70417  |
| 1441850_x_at | -0.74 | 1.93E-03 | Tcn2          | 21452  |
| 1422705_at   | -0.74 | 1.07E-03 | Pmepa1        | 65112  |
| 1418726_a_at | -0.75 | 9.33E-04 | Tnnt2         | 21956  |
| 1420741_x_at | -0.75 | 1.21E-03 | Lce1i         | 76585  |
| 1423662_at   | -0.75 | 8.17E-04 | Atp6ap2       | 70495  |
| 1428377_at   | -0.75 | 9.33E-04 | Btbd11        | 74007  |
| 1438531_at   | -0.75 | 3.10E-03 | A730054J21Rik | 320862 |
| 1446951_at   | -0.75 | 1.37E-03 | P4ha3         | 320452 |
| 1427446_s_at | -0.75 | 1.72E-03 | Ttn           | 22138  |
| 1427201_at   | -0.75 | 3.80E-03 | Mustn1        | 66175  |
| 1449519_at   | -0.75 | 7.66E-04 | Gadd45a       | 13197  |
| 1419050_at   | -0.75 | 2.24E-03 | Tmem8c        | 66139  |
| 1458087_at   | -0.75 | 1.72E-03 | Stac3         | 237611 |
| 1453372_at   | -0.75 | 1.00E-03 | Dnajc1        | 13418  |
| 1454734_at   | -0.76 | 2.52E-03 | Lef1          | 16842  |
| 1420884_at   | -0.76 | 5.53E-03 | Sln           | 66402  |
| 1418172_at   | -0.76 | 8.16E-04 | Hebp1         | 15199  |
| 1428942_at   | -0.76 | 7.53E-04 | Mt2           | 17750  |
| 1448873_at   | -0.76 | 1.21E-03 | Ocln          | 18260  |
| 1459941_at   | -0.76 | 5.03E-03 | Clvs1         | 74438  |
| 1438915_at   | -0.76 | 1.32E-03 | Firre         | 103012 |
| 1437268_at   | -0.76 | 1.21E-03 | Lancl3        | 236285 |
| 1437044_a_at | -0.76 | 7.28E-04 | Gba           | 14466  |
| 1438916_x_at | -0.76 | 5.60E-04 | Firre         | 103012 |
| 1437013_x_at | -0.76 | 7.66E-04 | Atp6v0b       | 114143 |
| 1449872_at   | -0.76 | 1.34E-03 | Hspb3         | 56534  |
| 1452599_s_at | -0.76 | 9.48E-04 | AI413582      | 106672 |
| 1448163_at   | -0.76 | 7.66E-04 | Gnpda1        | 26384  |
| 1448475_at   | -0.76 | 8.99E-04 | Olfml3        | 99543  |
| 1416830_at   | -0.76 | 5.48E-04 | Gimp          | 56700  |
| 1439708_at   | -0.77 | 8.37E-03 | Myom3         | 242702 |
| 1458882_at   | -0.77 | 5.97E-04 | Serpib8       | 20725  |
| 1456341_a_at | -0.77 | 6.75E-04 | Klf9          | 16601  |

|              |       |          |               |           |
|--------------|-------|----------|---------------|-----------|
| 1416343_a_at | -0.77 | 1.13E-03 | Lamp2         | 16784     |
| 1435463_s_at | -0.77 | 9.97E-04 | Myo1d         | 338367    |
| 1451484_a_at | -0.77 | 6.32E-04 | Syn1          | 20964     |
| 1448200_at   | -0.77 | 6.48E-04 | Tcn2          | 21452     |
| 1428988_at   | -0.77 | 1.53E-03 | Abcc3         | 76408     |
| 1418370_at   | -0.77 | 1.40E-03 | Tnnc1         | 21924     |
| 1453004_at   | -0.77 | 9.69E-04 | Slc22a23      | 73102     |
| 1448316_at   | -0.78 | 5.04E-04 | Cmtm3         | 68119     |
| 1440865_at   | -0.78 | 2.72E-03 | Ifitm6        | 213002    |
| 1448617_at   | -0.78 | 8.97E-04 | Cd53          | 12508     |
| 1417307_at   | -0.78 | 7.53E-04 | Dmd           | 13405     |
| 1450634_at   | -0.78 | 6.55E-04 | Atp6v1a       | 11964     |
| 1448596_at   | -0.78 | 5.04E-04 | Slc6a8        | 102857    |
| 1441937_s_at | -0.78 | 7.72E-04 | Pink1         | 68943     |
| 1450637_a_at | -0.78 | 1.20E-03 | Aebp1         | 11568     |
| 1450107_a_at | -0.78 | 2.52E-03 | Renbp         | 19703     |
| 1422541_at   | -0.78 | 9.63E-04 | Ptprm         | 19274     |
| 1416769_s_at | -0.78 | 5.04E-04 | Atp6v0b       | 114143    |
| 1419735_at   | -0.78 | 2.65E-03 | Csn3          | 12994     |
| 1449939_s_at | -0.78 | 1.23E-03 | Dlk1          | 13386     |
| 1427023_at   | -0.78 | 2.55E-03 | Phyhipl       | 70911     |
| 1447992_s_at | -0.78 | 1.19E-03 | Pcsk2         | 18549     |
| 1438165_x_at | -0.78 | 7.04E-04 | Vat1          | 26949     |
| 1420500_at   | -0.78 | 6.52E-04 | Dnajc1        | 13418     |
| 1433796_at   | -0.78 | 7.68E-04 | Endod1        | 71946     |
| 1448318_at   | -0.78 | 4.26E-04 | Plin2         | 11520     |
| 1455487_at   | -0.79 | 5.42E-04 | Mfsd11        | 69900     |
| 1435748_at   | -0.79 | 2.13E-03 | Gda           | 14544     |
| 1436467_at   | -0.79 | 9.07E-04 | D230004N17Rik | 100504017 |
| 1421106_at   | -0.79 | 2.48E-03 | Jag1          | 16449     |
| 1417695_a_at | -0.79 | 4.05E-04 | Soat1         | 20652     |
| 1431374_at   | -0.79 | 2.48E-03 | 6330407A03Rik | 70720     |
| 1450957_a_at | -0.79 | 4.18E-04 | Sqstm1        | 18412     |
| 1427894_at   | -0.79 | 1.70E-03 | Vasn          | 246154    |
| 1426122_a_at | -0.79 | 7.54E-03 | Coro6         | 216961    |
| 1436480_at   | -0.79 | 8.97E-04 | Dpp7          | 83768     |
| 1425668_a_at | -0.80 | 4.63E-04 | St3gal4       | 20443     |
| 1420924_at   | -0.80 | 4.05E-04 | Timp2         | 21858     |
| 1439568_at   | -0.80 | 7.89E-04 | Greb1         | 268527    |
| 1420499_at   | -0.80 | 8.36E-04 | Gch1          | 14528     |
| 1434308_at   | -0.80 | 7.97E-04 | Slc43a2       | 215113    |
| 1416101_a_at | -0.80 | 6.35E-04 | Hist1h1c      | 50708     |
| 1437401_at   | -0.80 | 7.16E-04 | Igf1          | 16000     |
| 1428284_at   | -0.80 | 1.53E-03 | Nol4l         | 329540    |
| 1421027_a_at | -0.80 | 1.14E-02 | Mef2c         | 17260     |

|              |       |          |               |        |
|--------------|-------|----------|---------------|--------|
| 1429693_at   | -0.80 | 1.19E-03 | Dab2          | 13132  |
| 1424967_x_at | -0.80 | 4.14E-04 | Tnnt2         | 21956  |
| 1438175_x_at | -0.80 | 2.87E-03 | Myom2         | 17930  |
| 1449532_at   | -0.80 | 9.07E-04 | Chrng         | 11449  |
| 1452295_at   | -0.81 | 7.89E-04 | Pmepa1        | 65112  |
| 1433474_at   | -0.81 | 7.90E-03 | Edil3         | 13612  |
| 1453011_at   | -0.81 | 1.62E-03 | Bdh2          | 69772  |
| 1422514_at   | -0.81 | 4.79E-04 | Aebp1         | 11568  |
| 1430768_at   | -0.81 | 6.56E-03 | 9530018H14Rik | 77395  |
| 1454137_s_at | -0.81 | 1.65E-03 | Hfe2          | 69585  |
| 1448301_s_at | -0.81 | 6.96E-04 | Serpib1a      | 66222  |
| 1449982_at   | -0.81 | 1.58E-03 | Il11          | 16156  |
| 1429116_at   | -0.81 | 3.21E-04 | Slc17a5       | 235504 |
| 1456609_at   | -0.82 | 4.82E-04 | Camk2n1       | 66259  |
| 1426108_s_at | -0.82 | 8.94E-04 | Cacnb1        | 12295  |
| 1423757_x_at | -0.82 | 3.57E-04 | Igfbp4        | 16010  |
| 1428902_at   | -0.82 | 4.49E-04 | Chst11        | 58250  |
| 1419208_at   | -0.82 | 1.11E-02 | Map3k8        | 26410  |
| 1429692_s_at | -0.82 | 1.88E-03 | Gch1          | 14528  |
| 1451596_a_at | -0.82 | 1.56E-03 | Sphk1         | 20698  |
| 1451474_a_at | -0.82 | 5.00E-04 | Parp8         | 52552  |
| 1440721_at   | -0.82 | 4.18E-04 | 5930433N17Rik | 399623 |
| 1417952_at   | -0.82 | 6.72E-04 | Cyp2j6        | 13110  |
| 1457819_at   | -0.82 | 1.12E-03 | Scn9a         | 20274  |
| 1450118_a_at | -0.83 | 1.39E-03 | Tnnt3         | 21957  |
| 1436297_a_at | -0.83 | 6.98E-04 | Grina         | 66168  |
| 1418296_at   | -0.83 | 3.67E-04 | Fxyd5         | 18301  |
| 1416046_a_at | -0.83 | 5.60E-04 | Fuca2         | 66848  |
| 1434812_s_at | -0.83 | 7.72E-04 | Dok7          | 231134 |
| 1419391_at   | -0.83 | 2.05E-03 | Myog          | 17928  |
| 1455258_at   | -0.83 | 1.41E-03 | Kcnc2         | 268345 |
| 1454677_at   | -0.83 | 4.63E-04 | Timp2         | 21858  |
| 1417346_at   | -0.84 | 2.26E-03 | Pycard        | 66824  |
| 1449702_at   | -0.84 | 4.16E-04 | Zfand2a       | 100494 |
| 1445323_at   | -0.84 | 7.60E-04 | Greb1         | 268527 |
| 1425128_at   | -0.84 | 8.39E-04 | B3gnt8        | 232984 |
| 1448371_at   | -0.84 | 3.78E-03 | Mylpf         | 17907  |
| 1447800_x_at | -0.84 | 4.63E-04 | Tcn2          | 21452  |
| 1418248_at   | -0.85 | 2.95E-04 | Gla           | 11605  |
| 1443823_s_at | -0.85 | 9.66E-04 | Atp1a2        | 98660  |
| 1422529_s_at | -0.85 | 1.63E-03 | Casq2         | 12373  |
| 1460318_at   | -0.85 | 3.87E-03 | Csrp3         | 13009  |
| 1440691_at   | -0.85 | 6.46E-04 | Cyp2j6        | 13110  |
| 1435146_s_at | -0.85 | 5.03E-03 | Cadm2         | 239857 |
| 1435663_at   | -0.85 | 1.94E-03 | Esr1          | 13982  |



|              |       |          |          |        |
|--------------|-------|----------|----------|--------|
| 1458550_at   | -0.85 | 1.63E-03 | Myo1d    | 338367 |
| 1416405_at   | -0.85 | 4.79E-04 | Bgn      | 12111  |
| 1447657_s_at | -0.85 | 2.58E-04 | Synpo2l  | 68760  |
| 1440739_at   | -0.86 | 8.99E-04 | Vegfc    | 22341  |
| 1428334_at   | -0.86 | 2.67E-04 | Ostm1    | 14628  |
| 1429752_x_at | -0.86 | 6.18E-04 | Clip4    | 78785  |
| 1423465_at   | -0.86 | 3.07E-04 | Frrs1    | 20321  |
| 1417492_at   | -0.86 | 4.88E-04 | Ctsb     | 13030  |
| 1428573_at   | -0.86 | 5.04E-04 | Chn2     | 69993  |
| 1440193_at   | -0.86 | 2.24E-04 | Ankrd12  | 106585 |
| 1459764_x_at | -0.86 | 2.48E-03 | Snx10    | 71982  |
| 1422720_at   | -0.86 | 1.61E-03 | Isl1     | 16392  |
| 1425702_a_at | -0.86 | 4.63E-04 | Enpp5    | 83965  |
| 1443721_x_at | -0.87 | 4.65E-03 | Sbno2    | 216161 |
| 1434070_at   | -0.87 | 4.02E-04 | Jag1     | 16449  |
| 1420693_at   | -0.87 | 2.11E-03 | Myom1    | 17929  |
| 1448871_at   | -0.87 | 2.48E-04 | Mapk13   | 26415  |
| 1424112_at   | -0.87 | 3.07E-04 | Igf2r    | 16004  |
| 1449434_at   | -0.87 | 4.69E-04 | Car3     | 12350  |
| 1448745_s_at | -0.88 | 2.88E-04 | Lor      | 16939  |
| 1433808_at   | -0.88 | 2.80E-04 | Mroh1    | 223658 |
| 1415687_a_at | -0.88 | 1.39E-03 | Psap     | 19156  |
| 1457825_x_at | -0.88 | 2.64E-04 | Tcn2     | 21452  |
| 1439293_at   | -0.88 | 2.78E-03 | Fam214a  | 235493 |
| 1424248_at   | -0.88 | 2.05E-04 | Arpp21   | 74100  |
| 1417423_at   | -0.89 | 2.91E-04 | Grina    | 66168  |
| 1452592_at   | -0.89 | 6.05E-04 | Mgst2    | 211666 |
| 1448128_at   | -0.89 | 2.00E-04 | Ctsa     | 19025  |
| 1417116_at   | -0.89 | 1.93E-04 | Slc6a8   | 102857 |
| 1416414_at   | -0.89 | 5.12E-04 | Emilin1  | 100952 |
| 1422811_at   | -0.90 | 2.19E-04 | Slc27a1  | 26457  |
| 1454646_at   | -0.90 | 4.00E-04 | Tcp112   | 216198 |
| 1424034_at   | -0.90 | 4.36E-04 | Rora     | 19883  |
| 1455812_x_at | -0.90 | 5.97E-04 | Vasn     | 246154 |
| 1434069_at   | -0.90 | 2.87E-04 | Prex1    | 277360 |
| 1442333_a_at | -0.90 | 1.35E-03 | Scn9a    | 20274  |
| 1423814_at   | -0.91 | 4.05E-04 | Ddx41    | 72935  |
| 1452249_at   | -0.91 | 4.63E-04 | Prickle1 | 106042 |
| 1417262_at   | -0.91 | 2.16E-03 | Ptgs2    | 19225  |
| 1415940_at   | -0.91 | 1.68E-04 | Zfand2a  | 100494 |
| 1448323_a_at | -0.91 | 7.53E-04 | Bgn      | 12111  |
| 1421975_a_at | -0.91 | 1.07E-03 | Add2     | 11519  |
| 1434740_at   | -0.91 | 1.93E-04 | Scarf2   | 224024 |
| 1434855_at   | -0.91 | 2.24E-04 | Amdhd2   | 245847 |
| 1451914_a_at | -0.91 | 1.39E-03 | Add2     | 11519  |

|              |       |          |          |        |
|--------------|-------|----------|----------|--------|
| 1424463_at   | -0.92 | 1.77E-04 | Mfsd6    | 98682  |
| 1448312_at   | -0.92 | 8.78E-04 | Pcsk2    | 18549  |
| 1451201_s_at | -0.92 | 1.85E-04 | Rnh1     | 107702 |
| 1417263_at   | -0.92 | 9.87E-04 | Ptgs2    | 19225  |
| 1430700_a_at | -0.92 | 4.37E-04 | Pla2g7   | 27226  |
| 1431362_a_at | -0.92 | 4.18E-04 | Smoc2    | 64074  |
| 1424852_at   | -0.92 | 1.71E-04 | Mef2c    | 17260  |
| 1431980_a_at | -0.92 | 1.99E-04 | As3mt    | 57344  |
| 1418471_at   | -0.92 | 3.07E-04 | Pgf      | 18654  |
| 1418373_at   | -0.92 | 3.33E-04 | Pgam2    | 56012  |
| 1416831_at   | -0.93 | 4.18E-04 | Neu1     | 18010  |
| 1460256_at   | -0.93 | 1.52E-03 | Car3     | 12350  |
| 1417688_at   | -0.93 | 1.89E-04 | Fam20c   | 80752  |
| 1423805_at   | -0.93 | 1.84E-04 | Dab2     | 13132  |
| 1442819_at   | -0.93 | 9.33E-04 | Rhbdl2   | 230726 |
| 1422313_a_at | -0.94 | 4.79E-04 | Igfbp5   | 16011  |
| 1455645_at   | -0.94 | 3.32E-03 | Mybpc1   | 109272 |
| 1415897_a_at | -0.94 | 2.82E-04 | Mgst1    | 56615  |
| 1433662_s_at | -0.94 | 2.01E-04 | Timp2    | 21858  |
| 1431835_at   | -0.95 | 1.53E-04 | Tcerg1l  | 70571  |
| 1417551_at   | -0.95 | 1.85E-04 | Cln3     | 12752  |
| 1448239_at   | -0.95 | 1.99E-04 | Hmox1    | 15368  |
| 1435504_at   | -0.95 | 3.18E-04 | Clip4    | 78785  |
| 1436613_at   | -0.95 | 1.50E-04 | Coro6    | 216961 |
| 1424214_at   | -0.96 | 1.50E-03 | Parm1    | 231440 |
| 1451539_at   | -0.96 | 1.61E-04 | Baiap2l1 | 66898  |
| 1435055_a_at | -0.96 | 1.32E-04 | Tom1     | 21968  |
| 1421813_a_at | -0.96 | 3.24E-03 | Psap     | 19156  |
| 1450040_at   | -0.97 | 1.59E-04 | Timp2    | 21858  |
| 1417889_at   | -0.97 | 2.70E-04 | Apobec2  | 11811  |
| 1438781_at   | -0.97 | 2.70E-04 | Tet2     | 214133 |
| 1420442_at   | -0.97 | 8.78E-04 | Cacna1s  | 12292  |
| 1451798_at   | -0.97 | 2.37E-03 | Il1rn    | 16181  |
| 1426851_a_at | -0.97 | 2.82E-04 | Nov      | 18133  |
| 1443968_at   | -0.97 | 2.15E-04 | Adarb1   | 110532 |
| 1422975_at   | -0.98 | 6.31E-04 | Mme      | 17380  |
| 1435813_at   | -0.98 | 1.12E-03 | Mypn     | 68802  |
| 1423259_at   | -0.98 | 4.72E-04 | Id4      | 15904  |
| 1419593_at   | -0.98 | 4.05E-04 | Greb1    | 268527 |
| 1419204_at   | -0.99 | 2.31E-04 | Dll1     | 13388  |
| 1422919_at   | -0.99 | 4.37E-04 | Hrasls   | 27281  |
| 1449024_a_at | -0.99 | 1.01E-04 | Hexa     | 15211  |
| 1451372_a_at | -0.99 | 6.31E-04 | Art1     | 11870  |
| 1419358_at   | -0.99 | 4.10E-04 | Sorcs2   | 81840  |
| 1438855_x_at | -1.00 | 1.30E-04 | Tnfaip2  | 21928  |

|              |       |          |               |        |
|--------------|-------|----------|---------------|--------|
| 1423256_a_at | -1.00 | 1.94E-04 | Atp6v1g1      | 66290  |
| 1422240_s_at | -1.00 | 5.68E-03 | Sprr2h        | 20762  |
| 1429460_at   | -1.00 | 5.97E-04 | Gpr115        | 78249  |
| 1423086_at   | -1.00 | 1.06E-04 | Npc1          | 18145  |
| 1433449_at   | -1.00 | 4.17E-04 | Snx32         | 225861 |
| 1428891_at   | -1.01 | 5.04E-04 | Parm1         | 231440 |
| 1428083_at   | -1.01 | 1.03E-04 | Neat1         | 66961  |
| 1460668_at   | -1.02 | 1.14E-04 | Gal           | 14419  |
| 1439658_at   | -1.02 | 1.08E-03 | Lmod3         | 320502 |
| 1416273_at   | -1.02 | 9.97E-05 | Tnfaip2       | 21928  |
| 1415874_at   | -1.02 | 4.14E-04 | Spry1         | 24063  |
| 1427278_at   | -1.02 | 9.41E-05 | Clip4         | 78785  |
| 1419417_at   | -1.02 | 2.27E-04 | Vegfc         | 22341  |
| 1438730_at   | -1.03 | 2.27E-04 | Nav1          | 215690 |
| 1428896_at   | -1.04 | 4.10E-04 | Pdgfrl        | 68797  |
| 1419289_a_at | -1.04 | 4.69E-04 | Syngn1        | 20972  |
| 1431076_at   | -1.04 | 1.14E-04 | Add2          | 11519  |
| 1450868_at   | -1.05 | 8.74E-05 | Hgsnat        | 52120  |
| 1435658_at   | -1.05 | 8.87E-05 | Slc27a1       | 26457  |
| 1448566_at   | -1.05 | 6.86E-04 | Slc40a1       | 53945  |
| 1416752_at   | -1.06 | 2.77E-03 | Ldb3          | 24131  |
| 1436479_a_at | -1.06 | 1.76E-04 | Dpp7          | 83768  |
| 1416344_at   | -1.06 | 8.59E-05 | Lamp2         | 16784  |
| 1436033_at   | -1.07 | 1.93E-04 | Fam214a       | 235493 |
| 1452330_a_at | -1.07 | 8.22E-05 | Mxra8         | 74761  |
| 1417994_a_at | -1.07 | 3.68E-04 | Asic2         | 11418  |
| 1418359_at   | -1.07 | 1.03E-04 | Wbscr27       | 79565  |
| 1429413_at   | -1.07 | 2.09E-04 | Cpm           | 70574  |
| 1457035_at   | -1.08 | 4.63E-04 | Al607873      | 226691 |
| 1453102_at   | -1.08 | 1.28E-03 | Flrt3         | 71436  |
| 1451475_at   | -1.08 | 1.14E-04 | Plxnd1        | 67784  |
| 1418829_a_at | -1.08 | 5.77E-05 | Eno2          | 13807  |
| 1418671_at   | -1.09 | 1.77E-04 | Capn5         | 12337  |
| 1424951_at   | -1.09 | 8.22E-05 | Baiap2l1      | 66898  |
| 1450928_at   | -1.09 | 2.33E-04 | Id4           | 15904  |
| 1456543_at   | -1.09 | 1.79E-04 | Prokr1        | 58182  |
| 1451263_a_at | -1.09 | 1.43E-03 | Fabp4         | 11770  |
| 1420940_x_at | -1.10 | 3.13E-04 | Rgs5          | 19737  |
| 1430642_at   | -1.10 | 2.61E-04 | 2900001G08Rik | 76950  |
| 1422586_at   | -1.10 | 9.07E-05 | Ecel1         | 13599  |
| 1424354_at   | -1.11 | 4.17E-04 | Tmem140       | 68487  |
| 1460204_at   | -1.11 | 5.56E-05 | Tec           | 21682  |
| 1427371_at   | -1.11 | 5.91E-04 | Abca8a        | 217258 |
| 1422125_at   | -1.11 | 1.59E-04 | Htr2b         | 15559  |
| 1452378_at   | -1.12 | 1.53E-03 | Malat1        | 72289  |

|              |       |          |          |           |
|--------------|-------|----------|----------|-----------|
| 1431043_at   | -1.12 | 8.64E-04 | Klhl40   | 72330     |
| 1449450_at   | -1.12 | 4.83E-05 | Ptges    | 64292     |
| 1415935_at   | -1.12 | 1.19E-04 | Smoc2    | 64074     |
| 1416318_at   | -1.12 | 1.09E-04 | Serpib1a | 66222     |
| 1435287_at   | -1.13 | 1.42E-04 | Add2     | 11519     |
| 1452651_a_at | -1.13 | 1.43E-03 | Myl1     | 17901     |
| 1416635_at   | -1.14 | 8.69E-05 | Smpd3a   | 57319     |
| 1441727_s_at | -1.15 | 5.04E-04 | Zfp467   | 68910     |
| 1457133_at   | -1.15 | 1.93E-04 | Tcerg1l  | 70571     |
| 1434175_s_at | -1.15 | 5.92E-05 | Tecpr1   | 70381     |
| 1427115_at   | -1.15 | 4.49E-04 | Myh3     | 17883     |
| 1423506_a_at | -1.16 | 3.60E-04 | Nnat     | 18111     |
| 1447806_s_at | -1.16 | 4.88E-04 | Srpk3    | 56504     |
| 1436188_a_at | -1.16 | 5.77E-05 | Ndr4     | 234593    |
| 1440645_at   | -1.17 | 6.60E-04 | BB114814 | 100043173 |
| 1450698_at   | -1.17 | 9.86E-05 | Dusp2    | 13537     |
| 1449449_at   | -1.17 | 1.94E-04 | Ptges    | 64292     |
| 1426615_s_at | -1.17 | 4.15E-05 | Ndr4     | 234593    |
| 1420942_s_at | -1.18 | 7.47E-04 | Rgs5     | 19737     |
| 1452114_s_at | -1.18 | 1.42E-04 | Igfbp5   | 16011     |
| 1448710_at   | -1.19 | 1.90E-04 | Cxcr4    | 12767     |
| 1422557_s_at | -1.19 | 5.77E-05 | Mt1      | 17748     |
| 1427427_at   | -1.19 | 1.74E-04 | Ryr3     | 20192     |
| 1452913_at   | -1.20 | 4.18E-04 | Pcp4l1   | 66425     |
| 1420941_at   | -1.20 | 1.69E-04 | Rgs5     | 19737     |
| 1427279_at   | -1.20 | 4.69E-04 | Clip4    | 78785     |
| 1434877_at   | -1.20 | 4.14E-05 | Nptx1    | 18164     |
| 1451006_at   | -1.20 | 5.81E-05 | Xdh      | 22436     |
| 1450511_at   | -1.21 | 3.13E-05 | Musk     | 18198     |
| 1439048_at   | -1.21 | 8.22E-05 | Cadm2    | 239857    |
| 1451344_at   | -1.21 | 2.70E-04 | Tmem119  | 231633    |
| 1450723_at   | -1.22 | 1.10E-04 | Isl1     | 16392     |
| 1459750_s_at | -1.22 | 1.10E-04 | Gpr123   | 52389     |
| 1433720_s_at | -1.23 | 3.13E-05 | Chchd10  | 103172    |
| 1450650_at   | -1.23 | 1.19E-04 | Myo10    | 17909     |
| 1435680_a_at | -1.24 | 4.13E-05 | Dpp7     | 83768     |
| 1435386_at   | -1.24 | 8.87E-05 | Vwf      | 22371     |
| 1417466_at   | -1.24 | 3.50E-04 | Rgs5     | 19737     |
| 1426852_x_at | -1.24 | 1.76E-04 | Nov      | 18133     |
| 1429310_at   | -1.24 | 9.86E-05 | Flrt3    | 71436     |
| 1427946_s_at | -1.26 | 9.86E-05 | Dpyd     | 99586     |
| 1423436_at   | -1.26 | 4.83E-05 | Gsta3    | 14859     |
| 1449383_at   | -1.26 | 2.50E-05 | Adssl1   | 11565     |
| 1429696_at   | -1.26 | 4.13E-05 | Gpr123   | 52389     |
| 1439965_at   | -1.27 | 2.76E-05 | Slc43a2  | 215113    |

|              |       |          |          |        |
|--------------|-------|----------|----------|--------|
| 1423255_at   | -1.27 | 2.76E-05 | Atp6v1g1 | 66290  |
| 1423989_at   | -1.27 | 2.99E-05 | Tecpr1   | 70381  |
| 1449164_at   | -1.28 | 2.59E-04 | Cd68     | 12514  |
| 1437523_s_at | -1.28 | 1.05E-03 | Sgcg     | 24053  |
| 1416996_at   | -1.28 | 2.99E-05 | Tbc1d8   | 54610  |
| 1427028_at   | -1.28 | 8.22E-05 | Lgr6     | 329252 |
| 1432555_at   | -1.28 | 7.96E-05 | Whrn     | 73750  |
| 1419127_at   | -1.29 | 1.53E-04 | Npy      | 109648 |
| 1436529_at   | -1.29 | 3.09E-04 | Gpr123   | 52389  |
| 1448529_at   | -1.31 | 8.22E-05 | Thbd     | 21824  |
| 1417464_at   | -1.31 | 5.04E-04 | Tnnc2    | 21925  |
| 1436218_at   | -1.31 | 1.28E-04 | Lgr6     | 329252 |
| 1453009_at   | -1.32 | 1.64E-04 | Cpm      | 70574  |
| 1422130_at   | -1.32 | 2.37E-05 | Nptx1    | 18164  |
| 1438619_x_at | -1.33 | 9.86E-05 | Zdhhc14  | 224454 |
| 1419487_at   | -1.34 | 4.36E-04 | Mybph    | 53311  |
| 1449218_at   | -1.35 | 6.04E-05 | Cox8b    | 12869  |
| 1448553_at   | -1.37 | 8.59E-05 | Myh7     | 140781 |
| 1452707_at   | -1.38 | 2.48E-04 | Klhl30   | 70788  |
| 1422580_at   | -1.38 | 8.87E-05 | Myl4     | 17896  |
| 1454903_at   | -1.38 | 2.83E-04 | Ngfr     | 18053  |
| 1420558_at   | -1.40 | 2.37E-05 | Selp     | 20344  |
| 1423756_s_at | -1.40 | 6.46E-05 | Igfbp4   | 16010  |
| 1449031_at   | -1.41 | 4.26E-04 | Cited1   | 12705  |
| 1439747_at   | -1.41 | 4.13E-05 | Ptges    | 64292  |
| 1418095_at   | -1.43 | 3.04E-03 | Smpx     | 66106  |
| 1420715_a_at | -1.43 | 2.83E-05 | Pparg    | 19016  |
| 1436990_s_at | -1.44 | 2.37E-05 | Chchd10  | 103172 |
| 1416023_at   | -1.44 | 1.18E-04 | Fabp3    | 14077  |
| 1428547_at   | -1.45 | 2.83E-05 | Nt5e     | 23959  |
| 1437405_a_at | -1.45 | 2.78E-05 | Igfbp4   | 16010  |
| 1436890_at   | -1.47 | 2.20E-05 | Uap1l1   | 227620 |
| 1434172_at   | -1.47 | 2.50E-05 | Cnr1     | 12801  |
| 1437614_x_at | -1.48 | 1.94E-04 | Zdhhc14  | 224454 |
| 1426622_a_at | -1.48 | 2.37E-05 | Qpct     | 70536  |
| 1416968_a_at | -1.48 | 1.44E-05 | Hsd3b7   | 101502 |
| 1452492_a_at | -1.48 | 2.37E-05 | Slc37a2  | 56857  |
| 1437385_at   | -1.49 | 4.83E-05 | Ccbe1    | 320924 |
| 1417061_at   | -1.50 | 5.43E-05 | Slc40a1  | 53945  |
| 1421424_a_at | -1.50 | 8.13E-04 | Anpep    | 16790  |
| 1457435_x_at | -1.51 | 5.86E-05 | Myom2    | 17930  |
| 1438975_x_at | -1.51 | 1.76E-04 | Zdhhc14  | 224454 |
| 1420674_at   | -1.51 | 2.37E-05 | Pla2g2e  | 26970  |
| 1427735_a_at | -1.53 | 6.32E-05 | Acta1    | 11459  |
| 1450813_a_at | -1.56 | 2.06E-05 | Tnni1    | 21952  |

|              |       |          |         |        |
|--------------|-------|----------|---------|--------|
| 1449544_a_at | -1.59 | 1.20E-05 | Kcnh2   | 16511  |
| 1432466_a_at | -1.59 | 1.30E-05 | Apoe    | 11816  |
| 1444061_at   | -1.61 | 2.20E-05 | Prr9    | 109314 |
| 1439345_at   | -1.61 | 2.47E-05 | Gpnmb   | 93695  |
| 1448303_at   | -1.62 | 1.20E-05 | Gpnmb   | 93695  |
| 1452141_a_at | -1.63 | 2.99E-05 | Sepp1   | 20363  |
| 1420653_at   | -1.69 | 2.72E-05 | Tgfb1   | 21803  |
| 1438707_at   | -1.71 | 4.13E-05 | Atp13a4 | 224079 |
| 1451203_at   | -1.80 | 1.37E-04 | Mb      | 17189  |
| 1426893_at   | -1.86 | 1.07E-05 | Fam102a | 98952  |
| 1450779_at   | -1.90 | 2.20E-05 | Fabp7   | 12140  |
| 1449906_at   | -2.04 | 1.07E-05 | Selp    | 20344  |
| 1417256_at   | -2.08 | 1.20E-05 | Mmp13   | 17386  |
| 1417023_a_at | -2.10 | 9.80E-06 | Fabp4   | 11770  |
| 1426894_s_at | -2.12 | 6.17E-06 | Fam102a | 98952  |
| 1437392_at   | -2.23 | 2.09E-05 | Syndig1 | 433485 |
| 1436486_x_at | -2.27 | 6.17E-06 | Whrn    | 73750  |
| 1436485_s_at | -2.49 | 6.17E-06 | Whrn    | 73750  |
| 1425888_at   | -2.63 | 1.44E-05 | Klra17  | 170733 |
